# Supplementary material for: Cross-Species Annotation of Expressed Genes and Detection of Different Functional Gene Modules Between 10 Cold- and 10 Hot-Propertied Chinese Herbal Medicines
Source: Front Genet. 2020 Jun 18;11:532. doi: 10.3389/fgene.2020.00532 (PMC7314971; doi:10.3389/fgene.2020.00532)
Supplement: DATA S3 — Dicotyledon-specific genes and non-dicotyledon-specific genes and enriched GO terms. [file Table_3.XLSX]

## Sheet: Specific genes
Dicotyledons		Non-dicotyledons
TAIR ID	Gene Name	TAIR ID	Gene Name
AT1G01140	CBL-interacting protein kinase 9(CIPK9)	AT1G01600	cytochrome P450, family 86, subfamily A, polypeptide 4(CYP86A4)
AT1G01510	NAD(P)-binding Rossmann-fold superfamily protein(AN)	AT1G01630	Sec14p-like phosphatidylinositol transfer family protein
AT1G01540	Protein kinase superfamily protein	AT1G04130	Tetratricopeptide repeat (TPR)-like superfamily protein(TPR2)
AT1G01860	Ribosomal RNA adenine dimethylase family protein(PFC1)	AT1G06030	pfkB-like carbohydrate kinase family protein
AT1G02060	Tetratricopeptide repeat (TPR)-like superfamily protein	AT1G06430	FTSH protease 8(FTSH8)
AT1G02145	homolog of asparagine-linked glycosylation 12(ALG12)	AT1G06650	2-oxoglutarate (2OG) and Fe(II)-dependent oxygenase superfamily protein
AT1G02260	Divalent ion symporter	AT1G11630	Tetratricopeptide repeat (TPR)-like superfamily protein
AT1G02360	Chitinase family protein	AT1G13180	Actin-like ATPase superfamily protein(DIS1)
AT1G02730	cellulose synthase-like D5(CSLD5)	AT1G13300	myb-like transcription factor family protein(HRS1)
AT1G02890	AAA-type ATPase family protein	AT1G14330	Galactose oxidase/kelch repeat superfamily protein
AT1G02930	glutathione S-transferase 6(GSTF6)	AT1G14670	Endomembrane protein 70 protein family
AT1G03060	BEACH-DOMAIN HOMOLOG A1(SPI)	AT1G15130	Endosomal targeting BRO1-like domain-containing protein
AT1G03510	Tetratricopeptide repeat (TPR)-like superfamily protein	AT1G15210	pleiotropic drug resistance 7(ABCG35)
AT1G04200	dyggve-melchior-clausen syndrome protein	AT1G15520	pleiotropic drug resistance 12(ABCG40)
AT1G04570	Major facilitator superfamily protein	AT1G15530	Concanavalin A-like lectin protein kinase family protein
AT1G04760	vesicle-associated membrane protein 726(VAMP726)	AT1G17530	translocase of inner mitochondrial membrane 23(TIM23-1)
AT1G04840	Tetratricopeptide repeat (TPR)-like superfamily protein	AT1G17730	vacuolar protein sorting 46.1(VPS46.1)
AT1G05060	coiled-coil protein	AT1G18470	Transmembrane Fragile-X-F-associated protein
AT1G05180	NAD(P)-binding Rossmann-fold superfamily protein(AXR1)	AT1G18660	zinc finger (C3HC4-type RING finger) family protein
AT1G05310	Pectin lyase-like superfamily protein	AT1G18840	IQ-domain 30(IQD30)
AT1G05470	DNAse I-like superfamily protein(CVP2)	AT1G19340	Methyltransferase MT-A70 family protein
AT1G05510	naphthalene 1,2-dioxygenase subunit alpha (DUF1264)	AT1G19600	pfkB-like carbohydrate kinase family protein
AT1G05690	BTB and TAZ domain protein 3(BT3)	AT1G19720	Pentatricopeptide repeat (PPR-like) superfamily protein
AT1G05730	FAM136A-like protein (DUF842)	AT1G19870	IQ-domain 32(iqd32)
AT1G05785	Got1/Sft2-like vescicle transport protein family	AT1G21360	glycolipid transfer protein 2(GLTP2)
AT1G05840	Eukaryotic aspartyl protease family protein	AT1G21380	Target of Myb protein 1
AT1G05900	endonuclease III 2(NTH2)	AT1G23200	Plant invertase/pectin methylesterase inhibitor superfamily
AT1G06020	pfkB-like carbohydrate kinase family protein	AT1G25290	RHOMBOID-like protein 10(RBL10)
AT1G06150	basic helix loop helix (bHLH) DNA-binding superfamily protein(EMB1444)	AT1G28560	snRNA activating complex family protein(SRD2)
AT1G06220	Ribosomal protein S5/Elongation factor G/III/V family protein(MEE5)	AT1G28650	GDSL-like Lipase/Acylhydrolase superfamily protein
AT1G06550	ATP-dependent caseinolytic (Clp) protease/crotonase family protein	AT1G30370	alpha/beta-Hydrolases superfamily protein(DLAH)
AT1G06620	2-oxoglutarate (2OG) and Fe(II)-dependent oxygenase superfamily protein	AT1G30490	Homeobox-leucine zipper family protein / lipid-binding START domain-containing protein(PHV)
AT1G06680	photosystem II subunit P-1(PSBP-1)	AT1G30680	toprim domain-containing protein
AT1G06690	NAD(P)-linked oxidoreductase superfamily protein	AT1G31720	chitin synthase, putative (DUF1218)
AT1G07030	Mitochondrial substrate carrier family protein	AT1G32220	NAD(P)-binding Rossmann-fold superfamily protein
AT1G07070	Ribosomal protein L35Ae family protein	AT1G32940	Subtilase family protein(SBT3.5)
AT1G07160	Protein phosphatase 2C family protein	AT1G32960	Subtilase family protein(SBT3.3)
AT1G07400	HSP20-like chaperones superfamily protein	AT1G33400	Tetratricopeptide repeat (TPR)-like superfamily protein(TPR9)
AT1G07510	FTSH protease 10(ftsh10)	AT1G43640	tubby like protein 5(TLP5)
AT1G07630	pol-like 5(PLL5)	AT1G43890	RAB GTPASE HOMOLOG B18(RAB18)
AT1G07740	Tetratricopeptide repeat (TPR)-like superfamily protein	AT1G45145	thioredoxin H-type 5(TRX5)
AT1G07840	Sas10/Utp3/C1D family	AT1G45160	Protein kinase superfamily protein
AT1G07870	Protein kinase superfamily protein	AT1G49040	stomatal cytokinesis defective / SCD1 protein (SCD1)(SCD1)
AT1G07920	GTP binding Elongation factor Tu family protein	AT1G50920	Nucleolar GTP-binding protein
AT1G08060	ATP-dependent helicase family protein(MOM)	AT1G51390	NFU domain protein 5(NFU5)
AT1G08280	Glycosyltransferase family 29 (sialyltransferase) family protein	AT1G53280	Class I glutamine amidotransferase-like superfamily protein(DJ1B)
AT1G08420	BRI1 suppressor 1 (BSU1)-like 2(BSL2)	AT1G53430	Leucine-rich repeat transmembrane protein kinase
AT1G08460	histone deacetylase 8(HDA08)	AT1G53830	pectin methylesterase 2(PME2)
AT1G08500	early nodulin-like protein 18(ENODL18)	AT1G54385	ARM repeat superfamily protein
AT1G08550	non-photochemical quenching 1(NPQ1)	AT1G55690	Sec14p-like phosphatidylinositol transfer family protein
AT1G08590	Leucine-rich receptor-like protein kinase family protein	AT1G55805	BolA-like family protein
AT1G08760	GPI-anchored adhesin-like protein, putative (DUF936)	AT1G55840	Sec14p-like phosphatidylinositol transfer family protein
AT1G08840	DNA replication helicase(emb2411)	AT1G55915	zinc ion binding protein
AT1G08980	amidase 1(AMI1)	AT1G56120	Leucine-rich repeat transmembrane protein kinase
AT1G09000	NPK1-related protein kinase 1(NP1)	AT1G56440	Tetratricopeptide repeat (TPR)-like superfamily protein(TPR5)
AT1G09160	Protein phosphatase 2C family protein	AT1G58190	receptor like protein 9(RLP9)
AT1G09190	Tetratricopeptide repeat (TPR)-like superfamily protein	AT1G59540	P-loop containing nucleoside triphosphate hydrolases superfamily protein(ZCF125)
AT1G09400	FMN-linked oxidoreductases superfamily protein	AT1G60590	Pectin lyase-like superfamily protein
AT1G09500	NAD(P)-binding Rossmann-fold superfamily protein	AT1G60930	RECQ helicase L4B(RECQ4B)
AT1G09590	Translation protein SH3-like family protein	AT1G62020	Coatomer, alpha subunit
AT1G09630	RAB GTPase 11C(RAB11c)	AT1G62610	NAD(P)-binding Rossmann-fold superfamily protein
AT1G09730	Cysteine proteinases superfamily protein	AT1G65790	receptor kinase 1(RK1)
AT1G09750	Eukaryotic aspartyl protease family protein	AT1G65920	Regulator of chromosome condensation (RCC1) family with FYVE zinc finger domain-containing protein
AT1G10010	amino acid permease 8(AAP8)	AT1G66330	senescence-associated family protein
AT1G10095	Protein prenylyltransferase superfamily protein	AT1G66920	Protein kinase superfamily protein
AT1G10290	dynamin-like protein 6(ADL6)	AT1G67180	zinc finger (C3HC4-type RING finger) family protein / BRCT domain-containing protein
AT1G10350	DNAJ heat shock family protein	AT1G67340	HCP-like superfamily protein with MYND-type zinc finger
AT1G10490	GNAT acetyltransferase (DUF699)	AT1G67590	Remorin family protein
AT1G10680	P-glycoprotein 10(PGP10)	AT1G67785	hypothetical protein
AT1G11050	Protein kinase superfamily protein	AT1G68540	NAD(P)-binding Rossmann-fold superfamily protein(TKPR2)
AT1G11100	SNF2 domain-containing protein / helicase domain-containing protein / zinc finger protein-like protein	AT1G69560	myb domain protein 105(MYB105)
AT1G11160	Transducin/WD40 repeat-like superfamily protein	AT1G69640	sphingoid base hydroxylase 1(SBH1)
AT1G11330	S-locus lectin protein kinase family protein	AT1G70280	NHL domain-containing protein
AT1G11340	G-type lectin S-receptor-like Serine/Threonine-kinase	AT1G71980	Protease-associated (PA) RING/U-box zinc finger family protein
AT1G11360	Adenine nucleotide alpha hydrolases-like superfamily protein	AT1G72340	NagB/RpiA/CoA transferase-like superfamily protein
AT1G11390	Protein kinase superfamily protein	AT1G72710	casein kinase 1-like protein 2(CKL2)
AT1G11650	RNA-binding (RRM/RBD/RNP motifs) family protein(RBP45B)	AT1G73000	PYR1-like 3(PYL3)
AT1G11720	starch synthase 3(SS3)	AT1G73240	nucleoporin protein Ndc1-Nup protein
AT1G11755	Undecaprenyl pyrophosphate synthetase family protein(LEW1)	AT1G73250	GDP-4-keto-6-deoxymannose-3,5-epimerase-4-reductase 1(GER1)
AT1G11760	mediator of RNA polymerase II transcription subunit-like protein(MED32)	AT1G74410	RING/U-box superfamily protein
AT1G11880	transferases, transferring hexosyl groups	AT1G74700	tRNAse Z1(TRZ1)
AT1G11890	Synaptobrevin family protein(SEC22)	AT1G75050	Pathogenesis-related thaumatin superfamily protein
AT1G12300	Tetratricopeptide repeat (TPR)-like superfamily protein	AT1G76460	RNA-binding (RRM/RBD/RNP motifs) family protein
AT1G12450	SNARE associated Golgi protein family	AT1G76690	12-oxophytodienoate reductase 2(OPR2)
AT1G12460	Leucine-rich repeat protein kinase family protein	AT1G78900	vacuolar ATP synthase subunit A(VHA-A)
AT1G12580	phosphoenolpyruvate carboxylase-related kinase 1(PEPKR1)	AT1G80060	Ubiquitin-like superfamily protein
AT1G12680	phosphoenolpyruvate carboxylase-related kinase 2(PEPKR2)	AT1G80280	alpha/beta-Hydrolases superfamily protein
AT1G13110	cytochrome P450, family 71 subfamily B, polypeptide 7(CYP71B7)	AT2G01755	hypothetical protein
AT1G13170	OSBP(oxysterol binding protein)-related protein 1D(ORP1D)	AT2G05310	transmembrane protein
AT1G13220	nuclear matrix constituent protein-like protein(LINC2)	AT2G06255	ELF4-like 3(ELF4-L3)
AT1G13230	Leucine-rich repeat (LRR) family protein	AT2G13360	alanine:glyoxylate aminotransferase(AGT)
AT1G13280	allene oxide cyclase 4(AOC4)	AT2G15560	Putative endonuclease or glycosyl hydrolase
AT1G13410	Tetratricopeptide repeat (TPR)-like superfamily protein	AT2G15790	peptidyl-prolyl cis-trans isomerase / cyclophilin-40 (CYP40) / rotamase(SQN)
AT1G13440	glyceraldehyde-3-phosphate dehydrogenase C2(GAPC2)	AT2G17440	plant intracellular ras group-related LRR 5(PIRL5)
AT1G13460	Protein phosphatase 2A regulatory B subunit family protein	AT2G18840	Integral membrane Yip1 family protein
AT1G13570	F-box/RNI-like superfamily protein	AT2G19130	S-locus lectin protein kinase family protein
AT1G13580	LAG1 longevity assurance-like protein(LAG13)	AT2G19210	Leucine-rich repeat transmembrane protein kinase protein
AT1G13635	DNA glycosylase superfamily protein	AT2G21440	RNA-binding (RRM/RBD/RNP motifs) family protein
AT1G13820	alpha/beta-Hydrolases superfamily protein	AT2G21520	Sec14p-like phosphatidylinositol transfer family protein
AT1G13960	WRKY DNA-binding protein 4(WRKY4)	AT2G21970	stress enhanced protein 2(SEP2)
AT1G14230	GDA1/CD39 nucleoside phosphatase family protein	AT2G23180	cytochrome P450, family 96, subfamily A, polypeptide 1(CYP96A1)
AT1G14420	Pectate lyase family protein(AT59)	AT2G24100	ATP-dependent DNA helicase(ASG1)
AT1G14590	Nucleotide-diphospho-sugar transferase family protein	AT2G24130	Leucine-rich receptor-like protein kinase family protein
AT1G14700	purple acid phosphatase 3(PAP3)	AT2G24270	aldehyde dehydrogenase 11A3(ALDH11A3)
AT1G14730	Cytochrome b561/ferric reductase transmembrane protein family	AT2G24360	Protein kinase superfamily protein
AT1G14820	Sec14p-like phosphatidylinositol transfer family protein	AT2G25220	Protein kinase superfamily protein
AT1G14830	DYNAMIN-like 1C(DL1C)	AT2G28315	Nucleotide/sugar transporter family protein
AT1G14850	nucleoporin 155(NUP155)	AT2G29260	NAD(P)-binding Rossmann-fold superfamily protein
AT1G15410	aspartate-glutamate racemase family	AT2G30530	zinc finger CCCH domain protein
AT1G15490	alpha/beta-Hydrolases superfamily protein	AT2G32460	myb domain protein 101(MYB101)
AT1G15690	Inorganic H pyrophosphatase family protein(AVP1)	AT2G33590	NAD(P)-binding Rossmann-fold superfamily protein(CRL1)
AT1G15910	XH/XS domain-containing protein(FDM1)	AT2G34710	Homeobox-leucine zipper family protein / lipid-binding START domain-containing protein(PHB)
AT1G15950	cinnamoyl coa reductase 1(CCR1)	AT2G35410	RNA-binding (RRM/RBD/RNP motifs) family protein
AT1G15970	DNA glycosylase superfamily protein	AT2G35610	xyloglucanase 113(XEG113)
AT1G16080	nuclear protein	AT2G36690	2-oxoglutarate (2OG) and Fe(II)-dependent oxygenase superfamily protein
AT1G16270	kinase superfamily with octicosapeptide/Phox/Bem1p domain-containing protein	AT2G36930	zinc finger (C2H2 type) family protein
AT1G16290	transglycosylase	AT2G37420	ATP binding microtubule motor family protein
AT1G16480	Tetratricopeptide repeat (TPR)-like superfamily protein	AT2G37540	NAD(P)-binding Rossmann-fold superfamily protein
AT1G16650	S-adenosyl-L-methionine-dependent methyltransferases superfamily protein	AT2G38050	3-oxo-5-alpha-steroid 4-dehydrogenase family protein(DET2)
AT1G16670	Protein kinase superfamily protein	AT2G39050	hydroxyproline-rich glycoprotein family protein(EULS3)
AT1G16830	Pentatricopeptide repeat (PPR) superfamily protein	AT2G39620	Pentatricopeptide repeat (PPR) superfamily protein
AT1G17330	Metal-dependent phosphohydrolase	AT2G39740	Nucleotidyltransferase family protein(HESO1)
AT1G17370	oligouridylate binding protein 1B(UBP1B)	AT2G39970	Mitochondrial substrate carrier family protein(PXN)
AT1G17745	D-3-phosphoglycerate dehydrogenase(PGDH)	AT2G40780	Nucleic acid-binding, OB-fold-like protein
AT1G17860	Kunitz family trypsin and protease inhibitor protein	AT2G41820	Leucine-rich repeat protein kinase family protein
AT1G17950	myb domain protein 52(MYB52)	AT2G44450	beta glucosidase 15(BGLU15)
AT1G17980	poly(A) polymerase 1(PAPS1)	AT2G44570	glycosyl hydrolase 9B12(GH9B12)
AT1G18170	FKBP-like peptidyl-prolyl cis-trans isomerase family protein	AT2G44710	RNA-binding (RRM/RBD/RNP motifs) family protein
AT1G18390	Serine/Threonine kinase family catalytic domain protein	AT2G46680	homeobox 7(HB-7)
AT1G18680	HNH endonuclease domain-containing protein	AT2G47680	zinc finger (CCCH type) helicase family protein
AT1G18720	ER membrane protein, putative (DUF962)	AT3G02130	receptor-like protein kinase 2(RPK2)
AT1G18890	calcium-dependent protein kinase 1(CDPK1)	AT3G02570	Mannose-6-phosphate isomerase, type I(MEE31)
AT1G19270	DA1(DA1)	AT3G03000	EF hand calcium-binding protein family
AT1G19310	RING/U-box superfamily protein	AT3G04030	Homeodomain-like superfamily protein(MYR2)
AT1G19330	histone deacetylase complex subunit	AT3G04080	apyrase 1(APY1)
AT1G19835	filament-like protein (DUF869)	AT3G04440	Plasma-membrane choline transporter family protein
AT1G19880	Regulator of chromosome condensation (RCC1) family protein	AT3G04750	Tetratricopeptide repeat (TPR)-like superfamily protein
AT1G19920	Pseudouridine synthase/archaeosine transglycosylase-like family protein(APS2)	AT3G05140	ROP binding protein kinases 2(RBK2)
AT1G20110	RING/FYVE/PHD zinc finger superfamily protein	AT3G05530	regulatory particle triple-A ATPase 5A(RPT5A)
AT1G20180	transmembrane protein (DUF677)	AT3G07100	Sec23/Sec24 protein transport family protein(ERMO2)
AT1G20380	Prolyl oligopeptidase family protein	AT3G07570	Cytochrome b561/ferric reductase transmembrane with DOMON related domain-containing protein
AT1G20650	Protein kinase superfamily protein(ASG5)	AT3G07980	mitogen-activated protein kinase kinase kinase 6(MAPKKK6)
AT1G20750	RAD3-like DNA-binding helicase protein	AT3G09010	Protein kinase superfamily protein
AT1G20780	senescence-associated E3 ubiquitin ligase 1(SAUL1)	AT3G09100	mRNA capping enzyme family protein
AT1G20990	Cysteine/Histidine-rich C1 domain family protein	AT3G10920	manganese superoxide dismutase 1(MSD1)
AT1G21070	Nucleotide-sugar transporter family protein	AT3G11180	2-oxoglutarate (2OG) and Fe(II)-dependent oxygenase superfamily protein
AT1G21200	sequence-specific DNA binding transcription factor	AT3G11780	MD-2-related lipid recognition domain-containing protein / ML domain-containing protein
AT1G21270	wall-associated kinase 2(WAK2)	AT3G11910	ubiquitin-specific protease 13(UBP13)
AT1G21440	Phosphoenolpyruvate carboxylase family protein	AT3G12710	DNA glycosylase superfamily protein
AT1G21450	SCARECROW-like 1(SCL1)	AT3G12770	mitochondrial editing factor 22(MEF22)
AT1G21590	kinase with adenine nucleotide alpha hydrolases-like domain-containing protein	AT3G12780	phosphoglycerate kinase 1(PGK1)
AT1G21640	NAD kinase 2(NADK2)	AT3G13770	Pentatricopeptide repeat (PPR) superfamily protein
AT1G21680	DPP6 N-terminal domain-like protein	AT3G13880	Tetratricopeptide repeat (TPR)-like superfamily protein
AT1G21710	8-oxoguanine-DNA glycosylase 1(OGG1)	AT3G14650	cytochrome P450, family 72, subfamily A, polypeptide 11(CYP72A11)
AT1G21740	DUF630 family protein, putative (DUF630 and DUF632)	AT3G14660	cytochrome P450, family 72, subfamily A, polypeptide 13(CYP72A13)
AT1G21760	F-box protein 7(FBP7)	AT3G14680	cytochrome P450, family 72, subfamily A, polypeptide 14(CYP72A14)
AT1G21840	urease accessory protein F(UREF)	AT3G15380	Plasma-membrane choline transporter family protein
AT1G22220	F-box family protein(AUF2)	AT3G15470	Transducin/WD40 repeat-like superfamily protein
AT1G22360	UDP-glucosyl transferase 85A2(UGT85A2)	AT3G16110	PDI-like 1-6(PDIL1-6)
AT1G22380	UDP-glucosyl transferase 85A3(UGT85A3)	AT3G16340	pleiotropic drug resistance 1(ABCG29)
AT1G22460	O-fucosyltransferase family protein	AT3G18380	DNA-BINDING TRANSCRIPTION FACTOR 2(SHH2)
AT1G22960	Pentatricopeptide repeat (PPR) superfamily protein	AT3G19010	2-oxoglutarate (2OG) and Fe(II)-dependent oxygenase superfamily protein
AT1G23180	ARM repeat superfamily protein	AT3G21060	Transducin/WD40 repeat-like superfamily protein(RBL)
AT1G24030	Protein kinase superfamily protein	AT3G21260	Glycolipid transfer protein (GLTP) family protein(GLTP3)
AT1G24120	ARG1-like 1(ARL1)	AT3G21400	dynein beta chain, ciliary protein
AT1G24280	glucose-6-phosphate dehydrogenase 3(G6PD3)	AT3G22270	Topoisomerase II-associated protein PAT1
AT1G24340	FAD/NAD(P)-binding oxidoreductase family protein(EMB2421)	AT3G22290	Endoplasmic reticulum vesicle transporter protein
AT1G24530	Transducin/WD40 repeat-like superfamily protein	AT3G22690	LOW protein: PPR containing-like protein
AT1G24735	S-adenosyl-L-methionine-dependent methyltransferases superfamily protein	AT3G43810	calmodulin 7(CAM7)
AT1G25380	NAD+ transporter 2(NDT2)	AT3G45040	phosphatidate cytidylyltransferase family protein
AT1G25390	Protein kinase superfamily protein	AT3G45050	transmembrane protein
AT1G25510	Eukaryotic aspartyl protease family protein	AT3G46020	RNA-binding (RRM/RBD/RNP motifs) family protein
AT1G26090	P-loop containing nucleoside triphosphate hydrolases superfamily protein	AT3G47420	putative glycerol-3-phosphate transporter 1(G3Pp1)
AT1G26150	proline-rich extensin-like receptor kinase 10(PERK10)	AT3G47550	RING/FYVE/PHD zinc finger superfamily protein
AT1G26230	TCP-1/cpn60 chaperonin family protein(Cpn60beta4)	AT3G47730	ATP-binding cassette A2(ABCA2)
AT1G26360	methyl esterase 13(MES13)	AT3G50120	transmembrane protein, putative (DUF247)
AT1G26761	Arabinanase/levansucrase/invertase	AT3G50670	U1 small nuclear ribonucleoprotein-70K(U1-70K)
AT1G27040	Major facilitator superfamily protein	AT3G50830	cold-regulated 413-plasma membrane 2(COR413-PM2)
AT1G27070	5'-AMP-activated protein kinase-like protein	AT3G51470	Protein phosphatase 2C family protein
AT1G27210	ARM repeat superfamily protein	AT3G51500	hypothetical protein
AT1G27752	Ubiquitin system component Cue protein	AT3G52910	growth-regulating factor 4(GRF4)
AT1G27770	autoinhibited Ca2+-ATPase 1(ACA1)	AT3G52990	Pyruvate kinase family protein
AT1G27880	DEAD/DEAH box RNA helicase family protein	AT3G53340	nuclear factor Y, subunit B10(NF-YB10)
AT1G27900	RNA helicase family protein	AT3G53540	afadin(TRM19)
AT1G27920	microtubule-associated protein 65-8(MAP65-8)	AT3G57490	Ribosomal protein S5 family protein
AT1G27940	P-glycoprotein 13(ABCB13)	AT3G58450	Adenine nucleotide alpha hydrolases-like superfamily protein
AT1G28230	purine permease 1(PUP1)	AT3G58500	protein phosphatase 2A-4(PP2A-4)
AT1G28420	homeobox-1(HB-1)	AT3G60860	SEC7-like guanine nucleotide exchange family protein
AT1G28960	nudix hydrolase homolog 15(NUDX15)	AT3G61460	brassinosteroid-responsive RING-H2(BRH1)
AT1G29050	TRICHOME BIREFRINGENCE-LIKE 38(TBL38)	AT3G61750	Cytochrome b561/ferric reductase transmembrane with DOMON related domain-containing protein
AT1G29300	intracellular protein transporter, putative (DUF641)(UNE1)	AT3G61860	RNA-binding (RRM/RBD/RNP motifs) family protein(RS31)
AT1G29350	RNA polymerase II degradation factor-like protein (DUF1296)	AT3G62330	Zinc knuckle (CCHC-type) family protein
AT1G29400	MEI2-like protein 5(ML5)	AT3G62890	Pentatricopeptide repeat (PPR) superfamily protein
AT1G29470	S-adenosyl-L-methionine-dependent methyltransferases superfamily protein	AT3G63530	RING/U-box superfamily protein(BB)
AT1G29660	GDSL-like Lipase/Acylhydrolase superfamily protein	AT4G02980	endoplasmic reticulum auxin binding protein 1(ABP1)
AT1G29670	GDSL-like Lipase/Acylhydrolase superfamily protein	AT4G03520	Thioredoxin superfamily protein(ATHM2)
AT1G30100	nine-cis-epoxycarotenoid dioxygenase 5(NCED5)	AT4G04720	calcium-dependent protein kinase 21(CPK21)
AT1G30400	multidrug resistance-associated protein 1(ABCC1)	AT4G05200	cysteine-rich RLK (RECEPTOR-like protein kinase) 25(CRK25)
AT1G30410	multidrug resistance-associated protein 13(ABCC12)	AT4G10120	Sucrose-phosphate synthase family protein(ATSPS4F)
AT1G30420	multidrug resistance-associated protein 12(ABCC11)	AT4G10150	RING/U-box superfamily protein
AT1G30440	Phototropic-responsive NPH3 family protein	AT4G10440	S-adenosyl-L-methionine-dependent methyltransferases superfamily protein
AT1G30470	SIT4 phosphatase-associated family protein	AT4G10520	Subtilase family protein
AT1G30840	purine permease 4(PUP4)	AT4G11440	Mitochondrial substrate carrier family protein
AT1G30900	VACUOLAR SORTING RECEPTOR 6(VSR6)	AT4G13850	glycine-rich RNA-binding protein 2(GR-RBP2)
AT1G31220	Formyl transferase	AT4G14620	hypothetical protein (DUF506)
AT1G31260	zinc transporter 10 precursor(ZIP10)	AT4G14870	secE/sec61-gamma protein transport protein(SECE1)
AT1G31340	related to ubiquitin 1(RUB1)	AT4G15180	SET domain protein 2(SDG2)
AT1G31490	HXXXD-type acyl-transferase family protein	AT4G17245	RING/U-box superfamily protein
AT1G31650	RHO guanyl-nucleotide exchange factor 14(ROPGEF14)	AT4G17486	PPPDE putative thiol peptidase family protein
AT1G31810	Formin Homology 14(AFH14)	AT4G18250	receptor Serine/Threonine kinase-like protein
AT1G31850	S-adenosyl-L-methionine-dependent methyltransferases superfamily protein	AT4G18596	Pollen Ole e 1 allergen and extensin family protein
AT1G31910	GHMP kinase family protein	AT4G20020	multiple organellar RNA editing factor(MORF1)
AT1G32130	Transcription elongation factor (TFIIS) family protein(IWS1)	AT4G20030	RNA-binding (RRM/RBD/RNP motifs) family protein
AT1G32230	WWE protein-protein interaction domain protein family(RCD1)	AT4G20140	Leucine-rich repeat transmembrane protein kinase(GSO1)
AT1G32580	plastid developmental protein DAG	AT4G20360	RAB GTPase homolog E1B(RABE1b)
AT1G33420	RING/FYVE/PHD zinc finger superfamily protein	AT4G24630	DHHC-type zinc finger family protein
AT1G33811	GDSL-like Lipase/Acylhydrolase superfamily protein	AT4G25420	2-oxoglutarate (2OG) and Fe(II)-dependent oxygenase superfamily protein(GA20OX1)
AT1G34120	inositol polyphosphate 5-phosphatase I(IP5PI)	AT4G25440	zinc finger WD40 repeat protein 1(ZFWD1)
AT1G34160	Tetratricopeptide repeat (TPR)-like superfamily protein	AT4G25840	glycerol-3-phosphatase 1(GPP1)
AT1G34270	Exostosin family protein	AT4G27420	ABC-2 type transporter family protein(ABCG9)
AT1G34470	magnesium transporter, putative (DUF803)	AT4G27780	acyl-CoA binding protein 2(ACBP2)
AT1G34630	transmembrane protein	AT4G27940	manganese tracking factor for mitochondrial SOD2(MTM1)
AT1G35620	PDI-like 5-2(PDIL5-2)	AT4G28100	transmembrane protein
AT1G35670	calcium-dependent protein kinase 2(CDPK2)	AT4G28590	polyadenylate-binding protein 2-binding protein(MRL7)
AT1G37130	nitrate reductase 2(NIA2)	AT4G28610	phosphate starvation response 1(PHR1)
AT1G42430	inactive purple acid phosphatase-like protein	AT4G28760	methyl-coenzyme M reductase II subunit gamma, putative (DUF3741)(TRM20)
AT1G43560	thioredoxin Y2(ty2)	AT4G29810	MAP kinase kinase 2(MKK2)
AT1G43900	Protein phosphatase 2C family protein	AT4G30020	PA-domain containing subtilase family protein
AT1G44970	Peroxidase superfamily protein	AT4G30390	UDP-arabinopyranose mutase
AT1G47330	methyltransferase, putative (DUF21)	AT4G30550	Class I glutamine amidotransferase-like superfamily protein(GGP3)
AT1G47550	exocyst complex component sec3A(SEC3A)	AT4G33210	F-box family protein(SLOMO)
AT1G47580	Pentatricopeptide repeat (PPR) superfamily protein(DYW1)	AT4G33760	tRNA synthetase class II (D, K and N) family protein
AT1G47710	Serine protease inhibitor (SERPIN) family protein(SERPIN1)	AT4G34260	1,2-alpha-L-fucosidase(FUC95A)
AT1G47740	PPPDE putative thiol peptidase family protein	AT4G34500	Protein kinase superfamily protein
AT1G47890	receptor like protein 7(RLP7)	AT4G36040	Chaperone DnaJ-domain superfamily protein(J11)
AT1G48040	Protein phosphatase 2C family protein	AT4G37270	heavy metal atpase 1(HMA1)
AT1G48120	serine/threonine-protein phosphatase 7 long form-like protein	AT4G37300	maternal effect embryo arrest 59(MEE59)
AT1G48175	Cytidine/deoxycytidylate deaminase family protein(emb2191)	AT4G38470	ACT-like protein tyrosine kinase family protein(STY46)
AT1G48550	Vacuolar protein sorting-associated protein 26	AT4G38740	rotamase CYP 1(ROC1)
AT1G48570	zinc finger (Ran-binding) family protein	AT4G39170	Sec14p-like phosphatidylinositol transfer family protein
AT1G48970	NagB/RpiA/CoA transferase-like superfamily protein	AT4G39690	MICOS complex subunit
AT1G49050	Eukaryotic aspartyl protease family protein	AT4G39960	Molecular chaperone Hsp40/DnaJ family protein
AT1G49170	hypothetical protein	AT5G01020	Protein kinase superfamily protein
AT1G49180	protein kinase family protein	AT5G01830	ARM repeat superfamily protein(SAUR21)
AT1G49470	transmembrane epididymal protein (DUF716)	AT5G02320	myb domain protein 3r-5(MYB3R-5)
AT1G49480	related to vernalization1 1(RTV1)	AT5G02390	TRM32-like protein (DUF3741)(DAU1)
AT1G49720	abscisic acid responsive element-binding factor 1(ABF1)	AT5G02940	ion channel POLLUX-like protein, putative (DUF1012)
AT1G49760	poly(A) binding protein 8(PAB8)	AT5G05340	Peroxidase superfamily protein(PRX52)
AT1G50120	immunoglobulin	AT5G05500	Pollen Ole e 1 allergen and extensin family protein(MOP10)
AT1G50140	P-loop containing nucleoside triphosphate hydrolases superfamily protein	AT5G06600	ubiquitin-specific protease 12(UBP12)
AT1G50270	Pentatricopeptide repeat (PPR) superfamily protein	AT5G08535	D111/G-patch domain-containing protein
AT1G50450	Saccharopine dehydrogenase	AT5G10530	Concanavalin A-like lectin protein kinase family protein
AT1G50480	10-formyltetrahydrofolate synthetase(THFS)	AT5G10650	RING/U-box superfamily protein
AT1G50670	OTU-like cysteine protease family protein	AT5G11270	overexpressor of cationic peroxidase 3(OCP3)
AT1G50700	calcium-dependent protein kinase 33(CPK33)	AT5G11640	Thioredoxin superfamily protein
AT1G50900	Ankyrin repeat family protein(GDC1)	AT5G12080	mechanosensitive channel of small conductance-like 10(MSL10)
AT1G51500	ABC-2 type transporter family protein(ABCG12)	AT5G12900	DNA double-strand break repair RAD50 ATPase
AT1G51540	Galactose oxidase/kelch repeat superfamily protein	AT5G13580	ABC-2 type transporter family protein(ABCG6)
AT1G51590	alpha-mannosidase 1(MNS1)	AT5G14460	Pseudouridine synthase family protein
AT1G51730	Ubiquitin-conjugating enzyme family protein	AT5G15550	Transducin/WD40 repeat-like superfamily protein
AT1G51800	Leucine-rich repeat protein kinase family protein(IOS1)	AT5G15580	longifolia1(LNG1)
AT1G52280	RAB GTPase homolog G3D(RABG3d)	AT5G16540	zinc finger nuclease 3(ZFN3)
AT1G52290	Protein kinase superfamily protein(PERK15)	AT5G16650	Chaperone DnaJ-domain superfamily protein
AT1G52360	Coatomer, beta' subunit	AT5G17710	Co-chaperone GrpE family protein(EMB1241)
AT1G52420	UDP-Glycosyltransferase superfamily protein	AT5G17840	DnaJ/Hsp40 cysteine-rich domain superfamily protein
AT1G52500	MUTM homolog-1(MMH-1)	AT5G18630	alpha/beta-Hydrolases superfamily protein
AT1G52630	O-fucosyltransferase family protein	AT5G18990	Pectin lyase-like superfamily protein
AT1G52640	Pentatricopeptide repeat (PPR) superfamily protein	AT5G19875	transmembrane protein
AT1G52920	G protein coupled receptor(GPCR)	AT5G20500	Glutaredoxin family protein
AT1G53000	Nucleotide-diphospho-sugar transferases superfamily protein(CKS)	AT5G21170	5'-AMP-activated protein kinase beta-2 subunit protein(AKINBETA1)
AT1G53040	tRNA (met) cytidine acetyltransferase, putative (DUF616)	AT5G23130	Peptidoglycan-binding LysM domain-containing protein
AT1G53050	Protein kinase superfamily protein	AT5G23535	KOW domain-containing protein
AT1G53165	Protein kinase superfamily protein(ATMAP4K ALPHA1)	AT5G25630	Tetratricopeptide repeat (TPR)-like superfamily protein
AT1G53330	Pentatricopeptide repeat (PPR) superfamily protein	AT5G25910	receptor like protein 52(RLP52)
AT1G53350	Disease resistance protein (CC-NBS-LRR class) family	AT5G26680	5'-3' exonuclease family protein
AT1G53380	hypothetical protein (DUF641)	AT5G33280	Voltage-gated chloride channel family protein
AT1G53400	Ubiquitin domain-containing protein	AT5G37350	Serine/threonine-protein kinase Rio1
AT1G53500	NAD-dependent epimerase/dehydratase family protein(MUM4)	AT5G37480	maltase-glucoamylase, intestinal protein
AT1G53600	Tetratricopeptide repeat (TPR)-like superfamily protein	AT5G38260	Protein kinase superfamily protein
AT1G53750	regulatory particle triple-A 1A(RPT1A)	AT5G38430	Ribulose bisphosphate carboxylase (small chain) family protein(RBCS1B)
AT1G53800	muscle M-line assembly protein	AT5G39250	F-box family protein
AT1G53910	related to AP2 12(RAP2.12)	AT5G40010	AAA-ATPase 1(AATP1)
AT1G53920	GDSL-motif lipase 5(GLIP5)	AT5G42930	alpha/beta-Hydrolases superfamily protein
AT1G54510	NIMA-related serine/threonine kinase 1(NEK1)	AT5G42960	outer envelope pore 24B-like protein
AT1G54540	Late embryogenesis abundant (LEA) hydroxyproline-rich glycoprotein family	AT5G43120	ARM-repeat/Tetratricopeptide repeat (TPR)-like protein
AT1G54610	Protein kinase superfamily protein	AT5G44700	Leucine-rich repeat transmembrane protein kinase(GSO2)
AT1G54680	translation initiation factor 3 subunit I	AT5G45280	Pectinacetylesterase family protein
AT1G54690	gamma histone variant H2AX(GAMMA-H2AX)	AT5G45410	zinc finger B-box protein
AT1G55020	lipoxygenase 1(LOX1)	AT5G45790	Ubiquitin carboxyl-terminal hydrolase family protein
AT1G55290	2-oxoglutarate (2OG) and Fe(II)-dependent oxygenase superfamily protein	AT5G50600	hydroxysteroid dehydrogenase 1(HSD1)
AT1G55370	NDH-dependent cyclic electron flow 5(NDF5)	AT5G51270	U-box domain-containing protein kinase family protein
AT1G55530	RING/U-box superfamily protein	AT5G51980	Transducin/WD40 repeat-like superfamily protein
AT1G55620	chloride channel F(CLC-F)	AT5G53140	Protein phosphatase 2C family protein
AT1G55630	Pentatricopeptide repeat (PPR) superfamily protein	AT5G54580	RNA-binding (RRM/RBD/RNP motifs) family protein
AT1G55850	cellulose synthase like E1(CSLE1)	AT5G54590	Protein kinase superfamily protein(CRLK1)
AT1G55910	zinc transporter 11 precursor(ZIP11)	AT5G54830	DOMON domain-containing protein / dopamine beta-monooxygenase N-terminal domain-containing protein
AT1G55980	FAD/NAD(P)-binding oxidoreductase family protein	AT5G56150	ubiquitin-conjugating enzyme 30(UBC30)
AT1G56130	Leucine-rich repeat transmembrane protein kinase	AT5G56580	MAP kinase kinase 6(MKK6)
AT1G56460	HIT zinc finger and PAPA-1-like domain-containing protein	AT5G56870	beta-galactosidase 4(BGAL4)
AT1G56570	Tetratricopeptide repeat (TPR)-like superfamily protein(PGN)	AT5G58140	phototropin 2(PHOT2)
AT1G56690	Pentatricopeptide repeat (PPR) superfamily protein	AT5G58250	YCF54(EMB3143)
AT1G58030	cationic amino acid transporter 2(CAT2)	AT5G58590	RAN binding protein 1(RANBP1)
AT1G58250	HYPERSENSITIVE TO PI STARVATION 4(SAB)	AT5G59610	Chaperone DnaJ-domain superfamily protein
AT1G58290	Glutamyl-tRNA reductase family protein(HEMA1)	AT5G60740	ABC transporter family protein(ABCG28)
AT1G58684	Ribosomal protein S5 family protein	AT5G60750	CAAX amino terminal protease family protein
AT1G59610	dynamin-like 3(DL3)	AT5G61680	Pectin lyase-like superfamily protein
AT1G60030	nucleobase-ascorbate transporter 7(NAT7)	AT5G62190	DEAD box RNA helicase (PRH75)(PRH75)
AT1G60420	DC1 domain-containing protein	AT5G62370	Tetratricopeptide repeat (TPR)-like superfamily protein
AT1G60650	RNA-binding (RRM/RBD/RNP motifs) family protein with retrovirus zinc finger-like domain-containing protein(AtRZ-1b)	AT5G64920	COP1-interacting protein 8(CIP8)
AT1G60750	NAD(P)-linked oxidoreductase superfamily protein	AT5G65160	tetratricopeptide repeat (TPR)-containing protein(TPR14)
AT1G60990	Glycine cleavage T-protein family	AT5G65205	NAD(P)-binding Rossmann-fold superfamily protein
AT1G61030	WAPL (Wings apart-like protein regulation of heterochromatin) protein	AT5G65570	Tetratricopeptide repeat (TPR)-like superfamily protein
AT1G61065	1,3-beta-glucan synthase component (DUF1218)	AT5G66380	folate transporter 1(FOLT1)
AT1G61520	PSI type III chlorophyll a/b-binding protein(LHCA3)	AT5G67200	Leucine-rich repeat protein kinase family protein
AT1G61590	Protein kinase superfamily protein	AT5G67270	end binding protein 1C(EB1C)
AT1G61600	DUF1262 family protein (DUF1262)
AT1G61670	Lung seven transmembrane receptor family protein
AT1G61680	terpene synthase 14(TPS14)
AT1G62260	mitochondrial editing factor 9(MEF9)
AT1G62350	Pentatricopeptide repeat (PPR) superfamily protein
AT1G62390	Octicosapeptide/Phox/Bem1p (PB1) domain-containing protein / tetratricopeptide repeat (TPR)-containing protein(Phox2)
AT1G62430	CDP-diacylglycerol synthase 1(CDS1)
AT1G62640	3-ketoacyl-acyl carrier protein synthase III(KAS III)
AT1G62720	Pentatricopeptide repeat (PPR-like) superfamily protein(NG1)
AT1G62740	stress-inducible protein(Hop2)
AT1G62990	homeobox knotted-like protein(KNAT7)
AT1G63020	nuclear RNA polymerase D1A(NRPD1A)
AT1G63080	Pentatricopeptide repeat (PPR) superfamily protein
AT1G63120	RHOMBOID-like 2(RBL2)
AT1G63130	Tetratricopeptide repeat (TPR)-like superfamily protein
AT1G63250	DEA(D/H)-box RNA helicase family protein
AT1G63330	Pentatricopeptide repeat (PPR) superfamily protein
AT1G63380	NAD(P)-binding Rossmann-fold superfamily protein
AT1G63710	cytochrome P450, family 86, subfamily A, polypeptide 7(CYP86A7)
AT1G64110	P-loop containing nucleoside triphosphate hydrolases superfamily protein(DAA1)
AT1G64480	calcineurin B-like protein 8(CBL8)
AT1G64610	Transducin/WD40 repeat-like superfamily protein
AT1G64890	Major facilitator superfamily protein
AT1G65040	RING/U-box superfamily protein(Hrd1B)
AT1G65660	Pre-mRNA splicing Prp18-interacting factor(SMP1)
AT1G65810	P-loop containing nucleoside triphosphate hydrolases superfamily protein
AT1G65850	Disease resistance protein (TIR-NBS-LRR class) family
AT1G65960	glutamate decarboxylase 2(GAD2)
AT1G66580	senescence associated gene 24(SAG24)
AT1G66750	CDK-activating kinase 4(CAK4)
AT1G67060	peptidase M50B-like protein
AT1G67310	Calmodulin-binding transcription activator protein with CG-1 and Ankyrin domain
AT1G67490	glucosidase 1(GCS1)
AT1G67510	Leucine-rich repeat protein kinase family protein
AT1G67720	Leucine-rich repeat protein kinase family protein
AT1G67830	alpha-fucosidase 1(FXG1)
AT1G67890	PAS domain-containing protein tyrosine kinase family protein
AT1G68000	phosphatidylinositol synthase 1(PIS1)
AT1G68220	aerobic coproporphyrinogen-III oxidase (DUF1218)
AT1G68590	Ribosomal protein PSRP-3/Ycf65(PSRP3/1)
AT1G68660	Ribosomal protein L12/ ATP-dependent Clp protease adaptor protein ClpS family protein
AT1G68690	Protein kinase superfamily protein(PERK9)
AT1G68720	tRNA arginine adenosine deaminase(TADA)
AT1G68760	nudix hydrolase 1(NUDX1)
AT1G68790	little nuclei3(LINC3)
AT1G68930	pentatricopeptide (PPR) repeat-containing protein
AT1G68980	Tetratricopeptide repeat (TPR)-like superfamily protein
AT1G68990	male gametophyte defective 3(MGP3)
AT1G69010	BES1-interacting Myc-like protein 2(BIM2)
AT1G69060	Chaperone DnaJ-domain superfamily protein
AT1G69410	eukaryotic elongation factor 5A-3(ELF5A-3)
AT1G69450	Early-responsive to dehydration stress protein (ERD4)
AT1G69490	NAC-like, activated by AP3/PI(NAP)
AT1G69610	zinc finger FYVE domain protein, putative (DUF1666)
AT1G69710	Regulator of chromosome condensation (RCC1) family with FYVE zinc finger domain-containing protein
AT1G69940	Pectin lyase-like superfamily protein(PPME1)
AT1G70060	SIN3-like 4(SNL4)
AT1G70320	ubiquitin-protein ligase 2(UPL2)
AT1G70410	beta carbonic anhydrase 4(BCA4)
AT1G70430	Protein kinase superfamily protein
AT1G70530	cysteine-rich RLK (RECEPTOR-like protein kinase) 3(CRK3)
AT1G70650	Ran BP2/NZF zinc finger-like superfamily protein
AT1G70740	Protein kinase superfamily protein
AT1G70940	Auxin efflux carrier family protein(PIN3)
AT1G71100	Ribose 5-phosphate isomerase, type A protein(RSW10)
AT1G71170	6-phosphogluconate dehydrogenase family protein
AT1G71250	GDSL-like Lipase/Acylhydrolase superfamily protein
AT1G71720	Nucleic acid-binding proteins superfamily(PDE338)
AT1G72030	Acyl-CoA N-acyltransferases (NAT) superfamily protein
AT1G72190	D-isomer specific 2-hydroxyacid dehydrogenase family protein
AT1G72250	Di-glucose binding protein with Kinesin motor domain-containing protein
AT1G72520	PLAT/LH2 domain-containing lipoxygenase family protein(LOX4)
AT1G72670	IQ-domain 8(iqd8)
AT1G73100	histone-lysine N-methyltransferase, H3 lysine-9 specific SUVH3-like protein(SUVH3)
AT1G73390	Endosomal targeting BRO1-like domain-containing protein
AT1G73500	MAP kinase kinase 9(MKK9)
AT1G73600	S-adenosyl-L-methionine-dependent methyltransferases superfamily protein
AT1G73660	protein tyrosine kinase family protein
AT1G73850	DNA ligase (DUF1666)
AT1G73960	TBP-associated factor 2(TAF2)
AT1G74120	Mitochondrial transcription termination factor family protein
AT1G74150	Galactose oxidase/kelch repeat superfamily protein
AT1G74250	DNAJ heat shock N-terminal domain-containing protein
AT1G74400	Tetratricopeptide repeat (TPR)-like superfamily protein
AT1G74520	HVA22 homologue A(HVA22A)
AT1G74600	pentatricopeptide (PPR) repeat-containing protein(OTP87)
AT1G74630	Tetratricopeptide repeat (TPR)-like superfamily protein
AT1G74740	calcium-dependent protein kinase 30(CPK30)
AT1G74790	catalytics
AT1G75020	lysophosphatidyl acyltransferase 4(LPAT4)
AT1G75130	cytochrome P450, family 721, subfamily A, polypeptide 1(CYP721A1)
AT1G75170	Sec14p-like phosphatidylinositol transfer family protein
AT1G75620	glyoxal oxidase-related protein
AT1G75680	glycosyl hydrolase 9B7(GH9B7)
AT1G75820	Leucine-rich receptor-like protein kinase family protein(CLV1)
AT1G75850	VPS35 homolog B(VPS35B)
AT1G75980	Single hybrid motif superfamily protein
AT1G76040	calcium-dependent protein kinase 29(CPK29)
AT1G76090	sterol methyltransferase 3(SMT3)
AT1G76110	HMG (high mobility group) box protein with ARID/BRIGHT DNA-binding domain-containing protein
AT1G76120	Pseudouridine synthase family protein
AT1G76250	transmembrane protein
AT1G76390	ARM repeat superfamily protein(PUB43)
AT1G76450	Photosystem II reaction center PsbP family protein
AT1G76920	F-box family protein
AT1G76940	RNA-binding (RRM/RBD/RNP motifs) family protein
AT1G77250	RING/FYVE/PHD-type zinc finger family protein
AT1G77410	beta-galactosidase 16(BGAL16)
AT1G77460	CELLULOSE SYNTHASE INTERACTIVE 3
AT1G77510	PDI-like 1-2(PDIL1-2)
AT1G77620	P-loop containing nucleoside triphosphate hydrolases superfamily protein
AT1G78160	pumilio 7(PUM7)
AT1G78290	Protein kinase superfamily protein(SNRK2-8)
AT1G78300	general regulatory factor 2(GRF2)
AT1G78370	glutathione S-transferase TAU 20(GSTU20)
AT1G78530	Protein kinase superfamily protein
AT1G78580	trehalose-6-phosphate synthase(TPS1)
AT1G78610	mechanosensitive channel of small conductance-like 6(MSL6)
AT1G78870	ubiquitin-conjugating enzyme 35(UBC35)
AT1G78915	Tetratricopeptide repeat (TPR)-like superfamily protein
AT1G79040	photosystem II subunit R(PSBR)
AT1G79250	AGC kinase 1.7(AGC1.7)
AT1G79570	kinase superfamily with octicosapeptide/Phox/Bem1p domain-containing protein
AT1G79630	Protein phosphatase 2C family protein
AT1G79810	Pex2/Pex12 N-terminal domain-containing protein / zinc finger (C3HC4-type RING finger) family protein(TED3)
AT1G79930	heat shock protein 91(HSP91)
AT1G80080	Leucine-rich repeat (LRR) family protein(TMM)
AT1G80260	Spc97 / Spc98 family of spindle pole body (SBP) component(emb1427)
AT1G80300	nucleotide transporter 1(NTT1)
AT1G80440	Galactose oxidase/kelch repeat superfamily protein
AT1G80550	Pentatricopeptide repeat (PPR) superfamily protein
AT1G80770	P-loop containing nucleoside triphosphate hydrolases superfamily protein(PDE318)
AT1G80840	WRKY DNA-binding protein 40(WRKY40)
AT1G80850	DNA glycosylase superfamily protein
AT1G80900	magnesium transporter 1(MGT1)
AT2G01060	myb-like HTH transcriptional regulator family protein
AT2G01130	DEA(D/H)-box RNA helicase family protein
AT2G01190	Octicosapeptide/Phox/Bem1p family protein(PDE331)
AT2G01275	RING/FYVE/PHD zinc finger superfamily protein
AT2G01390	Tetratricopeptide repeat (TPR)-like superfamily protein(EMB3111)
AT2G01740	Tetratricopeptide repeat (TPR)-like superfamily protein
AT2G01770	vacuolar iron transporter 1(VIT1)
AT2G01820	Leucine-rich repeat protein kinase family protein
AT2G01900	DNAse I-like superfamily protein
AT2G01950	BRI1-like 2(BRL2)
AT2G02000	glutamate decarboxylase 3(GAD3)
AT2G02148	PPR containing protein
AT2G02150	Tetratricopeptide repeat (TPR)-like superfamily protein(EMB2794)
AT2G02180	tobamovirus multiplication protein 3(TOM3)
AT2G02380	glutathione S-transferase (class zeta) 2(GSTZ2)
AT2G02390	glutathione S-transferase zeta 1(GSTZ1)
AT2G02400	NAD(P)-binding Rossmann-fold superfamily protein
AT2G02470	alfin-like 6(AL6)
AT2G02480	AAA-type ATPase family protein(STI)
AT2G02590	small multi-drug export protein
AT2G02800	protein kinase 2B(APK2B)
AT2G02810	UDP-galactose transporter 1(UTR1)
AT2G02870	Galactose oxidase/kelch repeat superfamily protein
AT2G03050	Mitochondrial transcription termination factor family protein(EMB93)
AT2G03620	magnesium transporter 3(MGT3)
AT2G04280	calcium ion-binding protein
AT2G04530	Metallo-hydrolase/oxidoreductase superfamily protein(CPZ)
AT2G04550	indole-3-butyric acid response 5(IBR5)
AT2G05230	DNAJ heat shock N-terminal domain-containing protein
AT2G05840	20S proteasome subunit PAA2(PAA2)
AT2G06005	FRIGIDA interacting protein 1(FIP1)
AT2G13620	cation/hydrogen exchanger 15(CHX15)
AT2G13810	AGD2-like defense response protein 1(ALD1)
AT2G14835	RING/U-box superfamily protein
AT2G14860	Peroxisomal membrane 22 kDa (Mpv17/PMP22) family protein
AT2G15530	RING/U-box superfamily protein(MBR1)
AT2G16630	Pollen Ole e 1 allergen and extensin family protein
AT2G16730	glycosyl hydrolase family 35 protein
AT2G16740	ubiquitin-conjugating enzyme 29(UBC29)
AT2G16940	Splicing factor, CC1-like protein
AT2G17210	Tetratricopeptide repeat (TPR)-like superfamily protein
AT2G17390	ankyrin repeat-containing 2B(AKR2B)
AT2G17525	Pentatricopeptide repeat (PPR) superfamily protein
AT2G17695	outer envelope protein
AT2G17800	RAC-like 1(ARAC1)
AT2G17850	Rhodanese/Cell cycle control phosphatase superfamily protein
AT2G17890	calcium-dependent protein kinase 16(CPK16)
AT2G17950	Homeodomain-like superfamily protein(WUS)
AT2G17970	2-oxoglutarate (2OG) and Fe(II)-dependent oxygenase superfamily protein
AT2G18170	MAP kinase 7(MPK7)
AT2G18470	roline-rich extensin-like receptor kinase 4(PERK4)
AT2G19090	DUF630 family protein (DUF630 and DUF632)
AT2G19120	P-loop containing nucleoside triphosphate hydrolases superfamily protein
AT2G19280	Pentatricopeptide repeat (PPR) superfamily protein
AT2G19580	tetraspanin2(TET2)
AT2G19860	hexokinase 2(HXK2)
AT2G19870	tRNA/rRNA methyltransferase (SpoU) family protein
AT2G20240	GPI-anchored adhesin-like protein, putative (DUF3741)(TRM17)
AT2G20300	Protein kinase superfamily protein(ALE2)
AT2G20470	AGC (cAMP-dependent, cGMP-dependent and protein kinase C) kinase family protein
AT2G20540	mitochondrial editing factor 21(MEF21)
AT2G20560	DNAJ heat shock family protein
AT2G20900	diacylglycerol kinase 5(DGK5)
AT2G21090	Pentatricopeptide repeat (PPR-like) superfamily protein
AT2G21120	magnesium transporter, putative (DUF803)
AT2G21270	ubiquitin fusion degradation 1(UFD1)
AT2G21380	Kinesin motor family protein
AT2G21590	Glucose-1-phosphate adenylyltransferase family protein(APL4)
AT2G21600	endoplasmatic reticulum retrieval protein 1B(RER1B)
AT2G21610	pectinesterase 11(PE11)
AT2G21720	ArgH (DUF639)
AT2G21770	cellulose synthase A9(CESA9)
AT2G22120	RING/FYVE/PHD zinc finger superfamily protein
AT2G22230	Thioesterase superfamily protein
AT2G22400	S-adenosyl-L-methionine-dependent methyltransferases superfamily protein
AT2G22590	UDP-Glycosyltransferase superfamily protein
AT2G22600	RNA-binding KH domain-containing protein
AT2G22610	Di-glucose binding protein with Kinesin motor domain-containing protein
AT2G22780	peroxisomal NAD-malate dehydrogenase 1(PMDH1)
AT2G23060	Acyl-CoA N-acyltransferases (NAT) superfamily protein
AT2G23420	nicotinate phosphoribosyltransferase 2(NAPRT2)
AT2G23450	Protein kinase superfamily protein
AT2G23470	root UVB sensitive protein (Protein of unknown function, DUF647)(RUS4)
AT2G23770	protein kinase family protein / peptidoglycan-binding LysM domain-containing protein(LYK4)
AT2G23910	NAD(P)-binding Rossmann-fold superfamily protein
AT2G23940	transmembrane protein (DUF788)
AT2G23950	Leucine-rich repeat protein kinase family protein
AT2G24600	Ankyrin repeat family protein
AT2G24940	membrane-associated progesterone binding protein 2(MAPR2)
AT2G24960	Myb/SANT-like DNA-binding domain protein
AT2G25290	Octicosapeptide/Phox/Bem1p (PB1) domain-containing protein / tetratricopeptide repeat (TPR)-containing protein(Phox1)
AT2G25430	epsin N-terminal homology (ENTH) domain-containing protein / clathrin assembly protein-like protein
AT2G25540	cellulose synthase A catalytic subunit 3 UDP-forming-like protein(CESA10)
AT2G25660	embryo defective 2410(emb2410)
AT2G26140	FTSH protease 4(ftsh4)
AT2G26440	Plant invertase/pectin methylesterase inhibitor superfamily
AT2G26600	Glycosyl hydrolase superfamily protein
AT2G26640	3-ketoacyl-CoA synthase 11(KCS11)
AT2G26920	Ubiquitin-associated/translation elongation factor EF1B protein
AT2G26990	proteasome family protein(FUS12)
AT2G27020	20S proteasome alpha subunit G1(PAG1)
AT2G27030	calmodulin 5(CAM5)
AT2G27060	Leucine-rich repeat protein kinase family protein
AT2G27200	P-loop containing nucleoside triphosphate hydrolases superfamily protein
AT2G27310	F-box family protein
AT2G27610	Tetratricopeptide repeat (TPR)-like superfamily protein
AT2G28100	alpha-L-fucosidase 1(FUC1)
AT2G28250	Protein kinase superfamily protein(NCRK)
AT2G28605	Photosystem II reaction center PsbP family protein
AT2G28620	P-loop containing nucleoside triphosphate hydrolases superfamily protein
AT2G28800	63 kDa inner membrane family protein(ALB3)
AT2G28970	Leucine-rich repeat protein kinase family protein
AT2G29150	NAD(P)-binding Rossmann-fold superfamily protein
AT2G30020	Protein phosphatase 2C family protein
AT2G30040	mitogen-activated protein kinase kinase kinase 14(MAPKKK14)
AT2G30160	Mitochondrial substrate carrier family protein
AT2G30220	GDSL-like Lipase/Acylhydrolase family protein
AT2G30260	U2 small nuclear ribonucleoprotein B(U2B'')
AT2G30310	GDSL-like Lipase/Acylhydrolase family protein
AT2G30490	cinnamate-4-hydroxylase(C4H)
AT2G30710	Ypt/Rab-GAP domain of gyp1p superfamily protein
AT2G30800	helicase in vascular tissue and tapetum(HVT1)
AT2G30820	aspartyl/glutamyl-tRNA(Asn/Gln) amidotransferase subunit
AT2G30830	2-oxoglutarate (2OG) and Fe(II)-dependent oxygenase superfamily protein
AT2G30860	glutathione S-transferase PHI 9(GSTF9)
AT2G31380	salt tolerance homologue(STH)
AT2G31390	pfkB-like carbohydrate kinase family protein
AT2G31440	gamma-secretase subunit APH1-like protein
AT2G31550	SGNH hydrolase-type esterase superfamily protein
AT2G31820	Ankyrin repeat family protein
AT2G31890	RAP(RAP)
AT2G31955	cofactor of nitrate reductase and xanthine dehydrogenase 2(CNX2)
AT2G32080	purin-rich alpha 1(PUR ALPHA-1)
AT2G32390	glutamate receptor 3.5(GLR3.5)
AT2G32700	LEUNIG-like protein(LUH)
AT2G32830	phosphate transporter 1;5(PHT1;5)
AT2G32860	beta glucosidase 33(BGLU33)
AT2G32920	PDI-like 2-3(PDIL2-3)
AT2G32930	zinc finger nuclease 2(ZFN2)
AT2G32950	Transducin/WD40 repeat-like superfamily protein(COP1)
AT2G33150	peroxisomal 3-ketoacyl-CoA thiolase 3(PKT3)
AT2G33320	Calcium-dependent lipid-binding (CaLB domain) family protein
AT2G33340	MOS4-associated complex 3B(MAC3B)
AT2G33550	Homeodomain-like superfamily protein
AT2G33560	BUB1-related (BUB1: budding uninhibited by benzymidazol 1)(BUBR1)
AT2G33630	NAD(P)-binding Rossmann-fold superfamily protein
AT2G33640	DHHC-type zinc finger family protein
AT2G33680	Tetratricopeptide repeat (TPR)-like superfamily protein
AT2G33760	Pentatricopeptide repeat (PPR) superfamily protein
AT2G33840	Tyrosyl-tRNA synthetase, class Ib, bacterial/mitochondrial
AT2G34070	TRICHOME BIREFRINGENCE-LIKE 37(TBL37)
AT2G34470	urease accessory protein G(UREG)
AT2G34650	Protein kinase superfamily protein(PID)
AT2G34860	DnaJ/Hsp40 cysteine-rich domain superfamily protein(EDA3)
AT2G34960	cationic amino acid transporter 5(CAT5)
AT2G35160	SU(VAR)3-9 homolog 5(SUVH5)
AT2G35340	helicase domain-containing protein(MEE29)
AT2G35620	Leucine-rich repeat protein kinase family protein(FEI2)
AT2G35650	cellulose synthase like(CSLA07)
AT2G35720	DNAJ heat shock N-terminal domain-containing protein(OWL1)
AT2G36240	pentatricopeptide (PPR) repeat-containing protein
AT2G36350	Protein kinase superfamily protein
AT2G36380	pleiotropic drug resistance 6(ABCG34)
AT2G36710	Pectin lyase-like superfamily protein
AT2G36720	Acyl-CoA N-acyltransferase with RING/FYVE/PHD-type zinc finger domain-containing protein
AT2G36730	Pentatricopeptide repeat (PPR) superfamily protein
AT2G36780	UDP-Glycosyltransferase superfamily protein
AT2G36810	ARM repeat superfamily protein
AT2G36840	ACT-like superfamily protein(ACR10)
AT2G36970	UDP-Glycosyltransferase superfamily protein
AT2G37360	ABC-2 type transporter family protein(ABCG2)
AT2G37520	Acyl-CoA N-acyltransferase with RING/FYVE/PHD-type zinc finger domain-containing protein
AT2G37640	Barwin-like endoglucanases superfamily protein(EXP3)
AT2G37770	NAD(P)-linked oxidoreductase superfamily protein(ChlAKR)
AT2G37840	Protein kinase superfamily protein
AT2G38100	proton-dependent oligopeptide transport (POT) family protein
AT2G38420	Pentatricopeptide repeat (PPR) superfamily protein
AT2G38620	cyclin-dependent kinase B1;2(CDKB1;2)
AT2G38740	Haloacid dehalogenase-like hydrolase (HAD) superfamily protein
AT2G38910	calcium-dependent protein kinase 20(CPK20)
AT2G39000	Acyl-CoA N-acyltransferases (NAT) superfamily protein
AT2G39230	LATERAL ORGAN JUNCTION(LOJ)
AT2G39780	ribonuclease 2(RNS2)
AT2G39800	delta1-pyrroline-5-carboxylate synthase 1(P5CS1)
AT2G40140	zinc finger (CCCH-type) family protein(CZF1)
AT2G40730	kinase family with ARM repeat domain-containing protein(CTEXP)
AT2G40770	RING-finger, DEAD-like helicase, PHD and SNF2 domain-containing protein
AT2G40815	Calcium-dependent lipid-binding (CaLB domain) family protein
AT2G40820	stomatal closure actin-binding-like protein
AT2G40830	RING-H2 finger C1A(RHC1A)
AT2G40890	cytochrome P450, family 98, subfamily A, polypeptide 3(CYP98A3)
AT2G40950	Basic-leucine zipper (bZIP) transcription factor family protein(BZIP17)
AT2G40980	Protein kinase superfamily protein
AT2G41040	S-adenosyl-L-methionine-dependent methyltransferases superfamily protein
AT2G41140	CDPK-related kinase 1(CRK1)
AT2G41490	UDP-glcnac-adolichol phosphate glcnac-1-p-transferase(GPT)
AT2G41620	Nucleoporin interacting component (Nup93/Nic96-like) family protein
AT2G41630	transcription factor IIB(TFIIB)
AT2G41680	NADPH-dependent thioredoxin reductase C(NTRC)
AT2G41710	Integrase-type DNA-binding superfamily protein
AT2G41770	transmembrane protein, putative (DUF288)
AT2G41990	late embryogenesis abundant protein
AT2G42070	nudix hydrolase homolog 23(NUDX23)
AT2G42130	Plastid-lipid associated protein PAP / fibrillin family protein
AT2G42230	C-CAP/cofactor C-like domain-containing protein
AT2G42320	nucleolar protein gar2-like protein
AT2G42580	tetratricopetide-repeat thioredoxin-like 3(TTL3)
AT2G42690	alpha/beta-Hydrolases superfamily protein
AT2G42740	ribosomal protein large subunit 16A(RPL16A)
AT2G42800	receptor like protein 29(RLP29)
AT2G42810	protein phosphatase 5.2(PP5.2)
AT2G42920	Pentatricopeptide repeat (PPR-like) superfamily protein
AT2G43160	ENTH/VHS family protein
AT2G43190	ribonuclease P family protein(POP4)
AT2G43250	transmembrane protein
AT2G43790	MAP kinase 6(MPK6)
AT2G43810	Small nuclear ribonucleoprotein family protein(LSM6B)
AT2G44130	Galactose oxidase/kelch repeat superfamily protein
AT2G44140	Peptidase family C54 protein
AT2G44260	DUF946 family protein (DUF946)
AT2G44430	DNA-binding bromodomain-containing protein
AT2G44980	SNF2 domain-containing protein / helicase domain-containing protein(ASG3)
AT2G45220	Plant invertase/pectin methylesterase inhibitor superfamily
AT2G45240	methionine aminopeptidase 1A(MAP1A)
AT2G45400	NAD(P)-binding Rossmann-fold superfamily protein(BEN1)
AT2G45540	WD-40 repeat family protein / beige-like protein
AT2G45550	cytochrome P450, family 76, subfamily C, polypeptide 4(CYP76C4)
AT2G45670	calcineurin B subunit-like protein
AT2G45750	S-adenosyl-L-methionine-dependent methyltransferases superfamily protein
AT2G45830	downstream target of AGL15 2(DTA2)
AT2G45960	plasma membrane intrinsic protein 1B(PIP1B)
AT2G45970	cytochrome P450, family 86, subfamily A, polypeptide 8(CYP86A8)
AT2G46000	LDL receptor wingless signaling/trafficking chaperone
AT2G46020	transcription regulatory protein SNF2(BRM)
AT2G46060	transmembrane protein-like protein
AT2G46180	golgin Putative 4(GC4)
AT2G46225	ABI-1-like 1(ABIL1)
AT2G46660	cytochrome P450, family 78, subfamily A, polypeptide 6(CYP78A6)
AT2G46700	CDPK-related kinase 3(CRK3)
AT2G46890	3-oxo-5-alpha-steroid 4-dehydrogenase (DUF1295)
AT2G46915	DUF3754 family protein, putative (DUF3754)
AT2G47010	calcium/calcium/calmodulin-dependent Serine/Threonine-kinase
AT2G47140	NAD(P)-binding Rossmann-fold superfamily protein(SDR5)
AT2G47250	RNA helicase family protein
AT2G47410	WD40 domain-containing protein
AT2G47580	spliceosomal protein U1A(U1A)
AT2G47600	magnesium/proton exchanger(MHX)
AT2G47710	Adenine nucleotide alpha hydrolases-like superfamily protein
AT2G48020	Major facilitator superfamily protein
AT3G01340	Transducin/WD40 repeat-like superfamily protein
AT3G01470	homeobox 1(HB-1)
AT3G01550	phosphoenolpyruvate (pep)/phosphate translocator 2(PPT2)
AT3G01580	Tetratricopeptide repeat (TPR)-like superfamily protein
AT3G01590	Galactose mutarotase-like superfamily protein
AT3G01610	cell division cycle 48C(CDC48C)
AT3G01690	alpha/beta-Hydrolases superfamily protein
AT3G01810	EEIG1/EHBP1 protein amino-terminal domain protein
AT3G01840	Protein kinase superfamily protein(LYK2)
AT3G02010	Pentatricopeptide repeat (PPR) superfamily protein
AT3G02280	Flavodoxin family protein
AT3G02320	N2,N2-dimethylguanosine tRNA methyltransferase
AT3G02490	Pentatricopeptide repeat (PPR) superfamily protein
AT3G02540	Rad23 UV excision repair protein family(RAD23C)
AT3G02645	transmembrane protein, putative (DUF247)
AT3G02700	NC domain-containing protein-like protein
AT3G02730	thioredoxin F-type 1(TRXF1)
AT3G02740	Eukaryotic aspartyl protease family protein
AT3G02875	Peptidase M20/M25/M40 family protein(ILR1)
AT3G02880	Leucine-rich repeat protein kinase family protein
AT3G03050	cellulose synthase-like D3(CSLD3)
AT3G03270	Adenine nucleotide alpha hydrolases-like superfamily protein
AT3G03580	Tetratricopeptide repeat (TPR)-like superfamily protein
AT3G03600	ribosomal protein S2(RPS2)
AT3G03800	syntaxin of plants 131(SYP131)
AT3G03910	glutamate dehydrogenase 3(GDH3)
AT3G04290	Li-tolerant lipase 1(LTL1)
AT3G04350	vacuolar sorting-associated protein (DUF946)
AT3G04550	rubisco accumulation factor-like protein
AT3G04780	PITH domain protein (DUF1000)
AT3G04810	NIMA-related kinase 2(NEK2)
AT3G04940	cysteine synthase D1(CYSD1)
AT3G04970	DHHC-type zinc finger family protein
AT3G05010	Protein of unknown function, transmembrane-40(Cand2)
AT3G05240	mitochondrial editing factor 19(MEF19)
AT3G05340	Tetratricopeptide repeat (TPR)-like superfamily protein
AT3G05350	Metallopeptidase M24 family protein
AT3G05390	S-adenosyl-L-methionine-dependent methyltransferase
AT3G05500	Rubber elongation factor protein (REF)
AT3G05620	Plant invertase/pectin methylesterase inhibitor superfamily
AT3G05840	Protein kinase superfamily protein(ATSK12)
AT3G06060	NAD(P)-binding Rossmann-fold superfamily protein(TSC10A)
AT3G06190	BTB-POZ and MATH domain 2(BPM2)
AT3G06260	galacturonosyltransferase-like 4(GATL4)
AT3G06270	Protein phosphatase 2C family protein
AT3G06960	pigment defective 320(PDE320)
AT3G07030	Alba DNA/RNA-binding protein
AT3G07300	NagB/RpiA/CoA transferase-like superfamily protein
AT3G07350	sulfate/thiosulfate import ATP-binding protein, putative (DUF506)
AT3G07550	RNI-like superfamily protein
AT3G07660	flocculation protein (DUF1296)
AT3G07670	Rubisco methyltransferase family protein
AT3G07690	6-phosphogluconate dehydrogenase family protein
AT3G07720	Galactose oxidase/kelch repeat superfamily protein
AT3G07950	rhomboid protein-like protein
AT3G07990	serine carboxypeptidase-like 27(SCPL27)
AT3G08020	PHD finger family protein
AT3G08505	zinc finger (CCCH-type/C3HC4-type RING finger) family protein
AT3G08510	phospholipase C 2(PLC2)
AT3G08550	elongation defective 1 protein / ELD1 protein(KOB1)
AT3G08670	serine/arginine repetitive matrix-like protein
AT3G08680	Leucine-rich repeat protein kinase family protein
AT3G08710	thioredoxin H-type 9(TH9)
AT3G09320	DHHC-type zinc finger family protein
AT3G09350	Fes1A(Fes1A)
AT3G09620	P-loop containing nucleoside triphosphate hydrolases superfamily protein
AT3G09710	IQ-domain 1(IQD1)
AT3G09780	CRINKLY4 related 1(CCR1)
AT3G09840	cell division cycle 48(CDC48)
AT3G09850	D111/G-patch domain-containing protein
AT3G10060	FKBP-like peptidyl-prolyl cis-trans isomerase family protein
AT3G10180	P-loop containing nucleoside triphosphate hydrolases superfamily protein
AT3G10310	P-loop nucleoside triphosphate hydrolases superfamily protein with CH (Calponin Homology) domain-containing protein
AT3G10540	3-phosphoinositide-dependent protein kinase
AT3G10840	alpha/beta-Hydrolases superfamily protein
AT3G11150	2-oxoglutarate (2OG) and Fe(II)-dependent oxygenase superfamily protein
AT3G11950	TRAF-like superfamily protein
AT3G12120	fatty acid desaturase 2(FAD2)
AT3G12250	TGACG motif-binding factor 6(TGA6)
AT3G12620	Protein phosphatase 2C family protein
AT3G12670	CTP synthase family protein(emb2742)
AT3G12680	floral homeotic protein (HUA1)(HUA1)
AT3G12870	transmembrane protein
AT3G13062	Polyketide cyclase/dehydrase and lipid transport superfamily protein
AT3G13150	Tetratricopeptide repeat (TPR)-like superfamily protein
AT3G13340	Transducin/WD40 repeat-like superfamily protein
AT3G13380	BRI1-like 3(BRL3)
AT3G13460	evolutionarily conserved C-terminal region 2(ECT2)
AT3G13560	O-Glycosyl hydrolases family 17 protein
AT3G13690	kinase with adenine nucleotide alpha hydrolases-like domain-containing protein
AT3G13920	eukaryotic translation initiation factor 4A1(EIF4A1)
AT3G14110	Tetratricopeptide repeat (TPR)-like superfamily protein(FLU)
AT3G14130	Aldolase-type TIM barrel family protein(HAOX1)
AT3G14180	sequence-specific DNA binding transcription factor(ASIL2)
AT3G14200	Chaperone DnaJ-domain superfamily protein
AT3G14240	Subtilase family protein
AT3G14270	phosphatidylinositol-4-phosphate 5-kinase family protein(FAB1B)
AT3G14310	pectin methylesterase 3(PME3)
AT3G14330	Tetratricopeptide repeat (TPR)-like superfamily protein
AT3G14640	cytochrome P450, family 72, subfamily A, polypeptide 10(CYP72A10)
AT3G14730	Pentatricopeptide repeat (PPR) superfamily protein
AT3G14840	Leucine-rich repeat transmembrane protein kinase
AT3G14890	phosphoesterase
AT3G15130	Tetratricopeptide repeat (TPR)-like superfamily protein
AT3G15430	Regulator of chromosome condensation (RCC1) family protein
AT3G15480	fiber (DUF1218)
AT3G15550	trichohyalin
AT3G15660	glutaredoxin 4(GRX4)
AT3G15720	Pectin lyase-like superfamily protein
AT3G15880	WUS-interacting protein 2(WSIP2)
AT3G15920	Phox (PX) domain-containing protein
AT3G15940	UDP-Glycosyltransferase superfamily protein
AT3G15980	Coatomer, beta' subunit
AT3G16050	pyridoxine biosynthesis 1.2(PDX1.2)
AT3G16180	Major facilitator superfamily protein
AT3G16260	tRNAse Z4(TRZ4)
AT3G16610	pentatricopeptide (PPR) repeat-containing protein
AT3G16650	Transducin/WD40 repeat-like superfamily protein
AT3G16780	Ribosomal protein L19e family protein
AT3G16810	pumilio 24(PUM24)
AT3G16890	pentatricopeptide (PPR) domain protein 40(PPR40)
AT3G17060	Pectin lyase-like superfamily protein
AT3G17350	wall-associated receptor kinase carboxy-terminal protein
AT3G17360	phragmoplast orienting kinesin 1(POK1)
AT3G17510	CBL-interacting protein kinase 1(CIPK1)
AT3G17650	YELLOW STRIPE like 5(YSL5)
AT3G17700	cyclic nucleotide-binding transporter 1(CNBT1)
AT3G17760	glutamate decarboxylase 5(GAD5)
AT3G17840	receptor-like kinase 902(RLK902)
AT3G17920	Outer arm dynein light chain 1 protein
AT3G18010	WUSCHEL related homeobox 1(WOX1)
AT3G18080	B-S glucosidase 44(BGLU44)
AT3G18100	myb domain protein 4r1(MYB4R1)
AT3G18260	Reticulon family protein
AT3G18370	C2 domain-containing protein(ATSYTF)
AT3G18390	CRS1 / YhbY (CRM) domain-containing protein(EMB1865)
AT3G18640	Zinc finger C-x8-C-x5-C-x3-H type family protein
AT3G18730	tetratricopeptide repeat (TPR)-containing protein(TSK)
AT3G18830	polyol/monosaccharide transporter 5(PMT5)
AT3G18870	Mitochondrial transcription termination factor family protein
AT3G18940	clast3-like protein
AT3G19000	2-oxoglutarate (2OG) and Fe(II)-dependent oxygenase superfamily protein
AT3G19050	phragmoplast orienting kinesin 2(POK2)
AT3G19090	RNA-binding protein(LARP6c)
AT3G19390	Granulin repeat cysteine protease family protein
AT3G19430	late embryogenesis abundant protein-related / LEA protein-like protein
AT3G19640	magnesium transporter 4(MGT4)
AT3G19810	BTB/POZ domain protein, putative (DUF177)
AT3G19840	pre-mRNA-processing protein 40C(PRP40C)
AT3G19850	Phototropic-responsive NPH3 family protein
AT3G19940	Major facilitator superfamily protein
AT3G19950	RING/U-box superfamily protein
AT3G20010	SNF2 domain-containing protein / helicase domain-containing protein / zinc finger protein-like protein
AT3G20050	T-complex protein 1 alpha subunit(TCP-1)
AT3G20320	trigalactosyldiacylglycerol2(ABCI15)
AT3G20330	PYRIMIDINE B(PYRB)
AT3G20395	RING/U-box superfamily protein
AT3G20440	Alpha amylase family protein(EMB2729)
AT3G20475	MUTS-homologue 5(MSH5)
AT3G20530	Protein kinase superfamily protein
AT3G20660	organic cation/carnitine transporter4(OCT4)
AT3G20860	Serine/Threonine kinase catalytic domain protein(NEK5)
AT3G20930	RNA-binding (RRM/RBD/RNP motifs) family protein
AT3G21175	ZIM-like 1(ZML1)
AT3G21220	MAP kinase kinase 5(MKK5)
AT3G21360	2-oxoglutarate (2OG) and Fe(II)-dependent oxygenase superfamily protein
AT3G21470	Pentatricopeptide repeat (PPR-like) superfamily protein
AT3G22200	Pyridoxal phosphate (PLP)-dependent transferases superfamily protein(POP2)
AT3G22230	Ribosomal L27e protein family
AT3G22250	UDP-Glycosyltransferase superfamily protein
AT3G22400	PLAT/LH2 domain-containing lipoxygenase family protein(LOX5)
AT3G22740	homocysteine S-methyltransferase 3(HMT3)
AT3G22810	auxin canalization protein (DUF828)
AT3G22930	calmodulin-like 11(CML11)
AT3G22970	hypothetical protein (DUF506)
AT3G22980	Ribosomal protein S5/Elongation factor G/III/V family protein
AT3G23270	Regulator of chromosome condensation (RCC1) family with FYVE zinc finger domain-containing protein
AT3G23330	Tetratricopeptide repeat (TPR)-like superfamily protein
AT3G23540	alpha/beta-Hydrolases superfamily protein
AT3G23590	REF4-related 1(RFR1)
AT3G23890	topoisomerase II(TOPII)
AT3G24040	Core-2/I-branching beta-1,6-N-acetylglucosaminyltransferase family protein
AT3G24200	FAD/NAD(P)-binding oxidoreductase family protein
AT3G24420	alpha/beta-Hydrolases superfamily protein
AT3G24480	Leucine-rich repeat (LRR) family protein
AT3G24503	aldehyde dehydrogenase 2C4(ALDH2C4)
AT3G24590	plastidic type i signal peptidase 1(PLSP1)
AT3G24600	late embryogenesis abundant protein, group 2
AT3G24715	kinase superfamily with octicosapeptide/Phox/Bem1p domain-containing protein
AT3G25040	endoplasmic reticulum retention defective 2B(ERD2B)
AT3G25060	Tetratricopeptide repeat (TPR)-like superfamily protein
AT3G25150	Nuclear transport factor 2 (NTF2) family protein with RNA binding (RRM-RBD-RNP motifs) domain-containing protein
AT3G25600	Calcium-binding EF-hand family protein
AT3G25620	ABC-2 type transporter family protein(ABCG21)
AT3G25670	Leucine-rich repeat (LRR) family protein
AT3G25860	2-oxoacid dehydrogenases acyltransferase family protein(LTA2)
AT3G25970	Pentatricopeptide repeat (PPR) superfamily protein
AT3G26000	Ribonuclease inhibitor
AT3G26040	HXXXD-type acyl-transferase family protein
AT3G26090	REGULATOR OF G-PROTEIN SIGNALING 1(RGS1)
AT3G26100	Regulator of chromosome condensation (RCC1) family protein
AT3G26300	cytochrome P450, family 71, subfamily B, polypeptide 34(CYP71B34)
AT3G26630	Tetratricopeptide repeat (TPR)-like superfamily protein
AT3G26935	DHHC-type zinc finger family protein
AT3G26960	Pollen Ole e 1 allergen and extensin family protein
AT3G27080	translocase of outer membrane 20 kDa subunit 3(TOM20-3)
AT3G27240	Cytochrome C1 family
AT3G27440	uridine kinase-like 5(UKL5)
AT3G27580	Protein kinase superfamily protein(ATPK7)
AT3G28390	P-glycoprotein 18(ABCB18)
AT3G28415	ABC transporter family protein(ABCB22)
AT3G28430	CLEC16A-like protein
AT3G28450	Leucine-rich repeat protein kinase family protein
AT3G28470	Duplicated homeodomain-like superfamily protein(TDF1)
AT3G28480	Oxoglutarate/iron-dependent oxygenase
AT3G29670	HXXXD-type acyl-transferase family protein(PMAT2)
AT3G30390	Transmembrane amino acid transporter family protein
AT3G33530	Transducin family protein / WD-40 repeat family protein
AT3G42050	vacuolar ATP synthase subunit H family protein
AT3G43190	sucrose synthase 4(SUS4)
AT3G43210	ATP binding microtubule motor family protein(TES)
AT3G43270	Plant invertase/pectin methylesterase inhibitor superfamily
AT3G44110	DNAJ homologue 3(J3)
AT3G44150	Expp1 protein
AT3G44200	serine/threonine-protein kinase NEK5(NEK6)
AT3G44490	histone deacetylase 17(hda17)
AT3G45640	mitogen-activated protein kinase 3(MPK3)
AT3G45880	2-oxoglutarate (2OG) and Fe(II)-dependent oxygenase superfamily protein
AT3G45960	expansin-like A3(EXLA3)
AT3G45980	Histone superfamily protein(HTB9)
AT3G46290	hercules receptor kinase 1(HERK1)
AT3G46520	actin-12(ACT12)
AT3G46620	zinc finger (C3HC4-type RING finger) family protein(RDUF1)
AT3G46740	translocon at the outer envelope membrane of chloroplasts 75-III(TOC75-III)
AT3G46920	kinase superfamily with octicosapeptide/Phox/Bem1p domain-containing protein
AT3G47000	Glycosyl hydrolase family protein
AT3G47300	SELT-like protein precursor(SELT)
AT3G47490	HNH endonuclease
AT3G47530	Pentatricopeptide repeat (PPR) superfamily protein
AT3G47630	translocator assembly/maintenance protein
AT3G47780	ABC2 homolog 6(ABCA7)
AT3G47840	Tetratricopeptide repeat (TPR)-like superfamily protein
AT3G47940	DNAJ heat shock family protein
AT3G47950	H[+]-ATPase 4(HA4)
AT3G47990	SUGAR-INSENSITIVE 3(SIS3)
AT3G48280	cytochrome P450, family 71, subfamily A, polypeptide 25(CYP71A25)
AT3G48310	cytochrome P450, family 71, subfamily A, polypeptide 22(CYP71A22)
AT3G48330	protein-l-isoaspartate methyltransferase 1(PIMT1)
AT3G48440	Zinc finger C-x8-C-x5-C-x3-H type family protein
AT3G48520	cytochrome P450, family 94, subfamily B, polypeptide 3(CYP94B3)
AT3G48550	SHOOT GRAVITROPISM-like protein
AT3G48730	glutamate-1-semialdehyde 2,1-aminomutase 2(GSA2)
AT3G48760	DHHC-type zinc finger family protein
AT3G48770	ATP/DNA binding protein
AT3G48860	coiled-coil protein
AT3G48940	Remorin family protein
AT3G48980	O-glucosyltransferase rumi-like protein (DUF821)
AT3G49260	IQ-domain 21(iqd21)
AT3G49310	Major facilitator superfamily protein
AT3G49340	Cysteine proteinases superfamily protein
AT3G49680	branched-chain aminotransferase 3(BCAT3)
AT3G49710	Pentatricopeptide repeat (PPR) superfamily protein
AT3G49720	transmembrane protein
AT3G49750	receptor like protein 44(RLP44)
AT3G49880	glycosyl hydrolase family protein 43
AT3G49910	Translation protein SH3-like family protein
AT3G50100	small RNA degrading nuclease 1(SDN1)
AT3G50360	centrin2(CEN2)
AT3G50400	GDSL-like Lipase/Acylhydrolase superfamily protein
AT3G50420	Pentatricopeptide repeat (PPR) superfamily protein
AT3G50430	golgin
AT3G50520	Phosphoglycerate mutase family protein
AT3G50530	CDPK-related kinase(CRK)
AT3G50685	anti-muellerian hormone type-2 receptor
AT3G51000	alpha/beta-Hydrolases superfamily protein
AT3G51130	transmembrane protein
AT3G51150	ATP binding microtubule motor family protein
AT3G51680	NAD(P)-binding Rossmann-fold superfamily protein(SDR2)
AT3G51740	inflorescence meristem receptor-like kinase 2(IMK2)
AT3G51895	sulfate transporter 3;1(SULTR3;1)
AT3G52080	cation/hydrogen exchanger 28(chx28)
AT3G52110	interferon-activable protein
AT3G52150	RNA-binding (RRM/RBD/RNP motifs) family protein(PSRP2)
AT3G52180	dual specificity protein phosphatase (DsPTP1) family protein(SEX4)
AT3G52310	ABC transporter G family member 27(ABCG27)
AT3G52390	TatD related DNase
AT3G52570	alpha/beta-Hydrolases superfamily protein
AT3G52660	RNA-binding (RRM/RBD/RNP motifs) family protein
AT3G53190	Pectin lyase-like superfamily protein
AT3G53230	ATPase, AAA-type, CDC48 protein(AtCDC48B)
AT3G53380	Concanavalin A-like lectin protein kinase family protein
AT3G53480	pleiotropic drug resistance 9(ABCG37)
AT3G53510	ABC-2 type transporter family protein(ABCG20)
AT3G53680	Acyl-CoA N-acyltransferase with RING/FYVE/PHD-type zinc finger domain-containing protein
AT3G53750	actin 3(ACT3)
AT3G53940	Mitochondrial substrate carrier family protein
AT3G54010	FKBP-type peptidyl-prolyl cis-trans isomerase family protein(PAS1)
AT3G54100	O-fucosyltransferase family protein
AT3G54140	peptide transporter 1(PTR1)
AT3G54180	cyclin-dependent kinase B1;1(CDKB1;1)
AT3G54290	hemerythrin HHE cation-binding domain protein
AT3G54300	vesicle-associated membrane protein 727(VAMP727)
AT3G54870	Armadillo/beta-catenin repeat family protein / kinesin motor family protein(MRH2)
AT3G54890	chlorophyll a-b binding protein 6(LHCA1)
AT3G54900	CAX interacting protein 1(CXIP1)
AT3G54960	PDI-like 1-3(PDIL1-3)
AT3G55030	phosphatidylglycerolphosphate synthase 2(PGPS2)
AT3G55040	glutathione transferase lambda 2(GSTL2)
AT3G55090	ABC-2 type transporter family protein(ABCG16)
AT3G55250	calcium homeostasis regulator(PDE329)
AT3G55260	beta-hexosaminidase 1(HEXO1)
AT3G55280	ribosomal protein L23AB(RPL23AB)
AT3G55290	NAD(P)-binding Rossmann-fold superfamily protein
AT3G55320	P-glycoprotein 20(ABCB20)
AT3G55340	phragmoplastin interacting protein 1(PHIP1)
AT3G55920	Cyclophilin-like peptidyl-prolyl cis-trans isomerase family protein
AT3G55970	jasmonate-regulated gene 21(JRG21)
AT3G56200	Transmembrane amino acid transporter family protein
AT3G56370	Leucine-rich repeat protein kinase family protein
AT3G56460	GroES-like zinc-binding alcohol dehydrogenase family protein
AT3G56690	Cam interacting protein 111(CIP111)
AT3G57120	Protein kinase superfamily protein
AT3G57520	seed imbibition 2(SIP2)
AT3G57600	Integrase-type DNA-binding superfamily protein
AT3G57610	adenylosuccinate synthase(ADSS)
AT3G57880	Calcium-dependent lipid-binding (CaLB domain) plant phosphoribosyltransferase family protein
AT3G58050	hypothetical protein
AT3G58140	phenylalanyl-tRNA synthetase class IIc family protein
AT3G58480	calmodulin-binding family protein
AT3G58510	DEA(D/H)-box RNA helicase family protein
AT3G58610	ketol-acid reductoisomerase
AT3G58750	citrate synthase 2(CSY2)
AT3G58760	Integrin-linked protein kinase family
AT3G59020	ARM repeat superfamily protein
AT3G59310	solute carrier family 35 protein (DUF914)
AT3G59350	Protein kinase superfamily protein
AT3G59410	protein kinase family protein(GCN2)
AT3G59490	hypothetical protein
AT3G59690	IQ-domain 13(IQD13)
AT3G59760	O-acetylserine (thiol) lyase isoform C(OASC)
AT3G59960	histone-lysine N-methyltransferase ASHH4(ASHH4)
AT3G59970	methylenetetrahydrofolate reductase 1(MTHFR1)
AT3G60050	Pentatricopeptide repeat (PPR) superfamily protein
AT3G60130	beta glucosidase 16(BGLU16)
AT3G60160	multidrug resistance-associated protein 9(ABCC9)
AT3G60220	TOXICOS EN LEVADURA 4(ATL4)
AT3G60260	ELMO/CED-12 family protein
AT3G60320	bZIP domain class transcription factor (DUF630 and DUF632)
AT3G60360	embryo sac development arrest 14(EDA14)
AT3G60410	hypothetical protein (DUF1639)
AT3G60730	Plant invertase/pectin methylesterase inhibitor superfamily
AT3G60800	DHHC-type zinc finger family protein
AT3G60810	DUF1499 family protein
AT3G61170	Tetratricopeptide repeat (TPR)-like superfamily protein
AT3G61270	O-glucosyltransferase rumi-like protein (DUF821)
AT3G61520	Pentatricopeptide repeat (PPR) superfamily protein
AT3G61620	3'-5'-exoribonuclease family protein(RRP41)
AT3G61760	DYNAMIN-like 1B(DL1B)
AT3G62010	metal ion-binding protein
AT3G62120	Class II aaRS and biotin synthetases superfamily protein
AT3G62130	Pyridoxal phosphate (PLP)-dependent transferases superfamily protein(LCD)
AT3G62150	P-glycoprotein 21(ABCB21)
AT3G62260	Protein phosphatase 2C family protein
AT3G62310	RNA helicase family protein
AT3G62820	Plant invertase/pectin methylesterase inhibitor superfamily protein
AT3G63030	methyl-CPG-binding domain 4(MBD4)
AT3G63110	isopentenyltransferase 3(IPT3)
AT3G63150	MIRO-related GTP-ase 2(MIRO2)
AT3G63280	NIMA-related kinase 4(NEK4)
AT3G63370	Tetratricopeptide repeat (TPR)-like superfamily protein(OTP86)
AT3G63380	ATPase E1-E2 type family protein / haloacid dehalogenase-like hydrolase family protein
AT3G63400	Cyclophilin-like peptidyl-prolyl cis-trans isomerase family protein
AT3G63410	S-adenosyl-L-methionine-dependent methyltransferases superfamily protein(APG1)
AT3G63430	zinc finger CCCH domain protein(TRM5)
AT3G63480	ATP binding microtubule motor family protein
AT4G00370	Major facilitator superfamily protein(ANTR2)
AT4G00430	plasma membrane intrinsic protein 1;4(PIP1;4)
AT4G00500	alpha/beta-Hydrolases superfamily protein
AT4G00720	shaggy-like protein kinase 32(SK32)
AT4G00830	RNA-binding (RRM/RBD/RNP motifs) family protein(LIF2)
AT4G01400	oligomeric golgi complex subunit-like protein
AT4G01650	Polyketide cyclase / dehydrase and lipid transport protein
AT4G01700	Chitinase family protein
AT4G01800	Albino or Glassy Yellow 1(AGY1)
AT4G01830	P-glycoprotein 5(ABCB5)
AT4G01935	insulin-induced protein
AT4G01970	stachyose synthase(STS)
AT4G02010	Protein kinase superfamily protein
AT4G02060	Minichromosome maintenance (MCM2/3/5) family protein(PRL)
AT4G02320	Plant invertase/pectin methylesterase inhibitor superfamily
AT4G02330	Plant invertase/pectin methylesterase inhibitor superfamily(ATPMEPCRB)
AT4G02350	exocyst complex component sec15B(SEC15B)
AT4G02370	pectinesterase (Protein of unknown function, DUF538)
AT4G02400	U3 ribonucleoprotein (Utp) family protein
AT4G02480	AAA-type ATPase family protein
AT4G02520	glutathione S-transferase PHI 2(GSTF2)
AT4G02600	Seven transmembrane MLO family protein(MLO1)
AT4G02630	Protein kinase superfamily protein
AT4G02720	Ras-induced vulval development antagonist protein
AT4G02860	Phenazine biosynthesis PhzC/PhzF protein
AT4G03140	NAD(P)-binding Rossmann-fold superfamily protein
AT4G03610	Metallo-hydrolase/oxidoreductase superfamily protein
AT4G04220	receptor like protein 46(RLP46)
AT4G04670	Met-10+ like family protein / kelch repeat-containing protein
AT4G05000	Vacuolar protein sorting-associated protein VPS28 family protein(VPS28-2)
AT4G05210	Trimeric LpxA-like enzymes superfamily protein(LpxD1)
AT4G05460	RNI-like superfamily protein
AT4G08320	Tetratricopeptide repeat (TPR)-like superfamily protein(TPR8)
AT4G08350	global transcription factor group A2(GTA2)
AT4G08480	mitogen-activated protein kinase kinase kinase 9(MAPKKK9)
AT4G08690	Sec14p-like phosphatidylinositol transfer family protein
AT4G08920	cryptochrome 1(CRY1)
AT4G09570	calcium-dependent protein kinase 4(CPK4)
AT4G09760	Protein kinase superfamily protein
AT4G09820	basic helix-loop-helix (bHLH) DNA-binding superfamily protein(TT8)
AT4G10340	light harvesting complex of photosystem II 5(LHCB5)
AT4G10490	2-oxoglutarate (2OG) and Fe(II)-dependent oxygenase superfamily protein
AT4G10530	Subtilase family protein
AT4G10750	Phosphoenolpyruvate carboxylase family protein
AT4G10840	Tetratricopeptide repeat (TPR)-like superfamily protein(KLCR1)
AT4G10925	Nuclear transport factor 2 (NTF2) family protein
AT4G11010	nucleoside diphosphate kinase 3(NDPK3)
AT4G11380	Adaptin family protein
AT4G11530	cysteine-rich RLK (RECEPTOR-like protein kinase) 34(CRK34)
AT4G11690	Pentatricopeptide repeat (PPR-like) superfamily protein
AT4G12030	bile acid transporter 5(BAT5)
AT4G12080	AT-hook motif nuclear-localized protein 1(AHL1)
AT4G12400	stress-inducible protein(Hop3)
AT4G12540	hypothetical protein
AT4G12680	transmembrane protein
AT4G12750	Homeodomain-like transcriptional regulator
AT4G13030	P-loop containing nucleoside triphosphate hydrolases superfamily protein
AT4G13150	transmembrane protein
AT4G13180	NAD(P)-binding Rossmann-fold superfamily protein
AT4G13650	Pentatricopeptide repeat (PPR) superfamily protein
AT4G13700	purple acid phosphatase 23(PAP23)
AT4G13800	magnesium transporter NIPA (DUF803)
AT4G14350	AGC (cAMP-dependent, cGMP-dependent and protein kinase C) kinase family protein
AT4G14368	Regulator of chromosome condensation (RCC1) family protein
AT4G14480	Protein kinase superfamily protein
AT4G14600	Target SNARE coiled-coil domain protein
AT4G14713	TIFY domain/Divergent CCT motif family protein(PPD1)
AT4G15430	ERD (early-responsive to dehydration stress) family protein
AT4G16143	importin alpha isoform 2(IMPA-2)
AT4G16190	Papain family cysteine protease
AT4G17000	neurofilament heavy protein
AT4G17280	Auxin-responsive family protein
AT4G17380	MUTS-like protein 4(MSH4)
AT4G17520	Hyaluronan / mRNA binding family
AT4G17550	Major facilitator superfamily protein(G3Pp4)
AT4G17620	glycine-rich protein
AT4G18030	S-adenosyl-L-methionine-dependent methyltransferases superfamily protein
AT4G18050	P-glycoprotein 9(ABCB9)
AT4G18100	Ribosomal protein L32e
AT4G18210	purine permease 10(PUP10)
AT4G18230	UDP-N-acetylglucosamine transferase subunit ALG14-like protein
AT4G18260	Cytochrome b561/ferric reductase transmembrane protein family
AT4G18290	potassium channel KAT1-like protein(KAT2)
AT4G18380	F-box family protein
AT4G18425	transmembrane protein, putative (DUF679)
AT4G18480	P-loop containing nucleoside triphosphate hydrolases superfamily protein(CHLI1)
AT4G18490	hypothetical protein
AT4G18830	ovate family protein 5(OFP5)
AT4G18840	Pentatricopeptide repeat (PPR-like) superfamily protein
AT4G18950	Integrin-linked protein kinase family
AT4G19220	Tetratricopeptide repeat (TPR)-like superfamily protein
AT4G19400	Profilin family protein
AT4G19420	Pectinacetylesterase family protein
AT4G19670	RING/U-box superfamily protein
AT4G19840	phloem protein 2-A1(PP2-A1)
AT4G20270	Leucine-rich receptor-like protein kinase family protein(BAM3)
AT4G20330	Transcription initiation factor TFIIE, beta subunit
AT4G20770	Pentatricopeptide repeat (PPR) superfamily protein
AT4G21180	DnaJ / Sec63 Brl domains-containing protein(ATERDJ2B)
AT4G21200	gibberellin 2-oxidase 8(GA2OX8)
AT4G21270	kinesin 1(ATK1)
AT4G21310	transmembrane protein, putative (DUF1218)
AT4G21390	S-locus lectin protein kinase family protein(B120)
AT4G21440	MYB-like 102(MYB102)
AT4G21460	Ribosomal protein S24/S35
AT4G21570	organic solute transporter ostalpha protein (DUF300)
AT4G21580	oxidoreductase, zinc-binding dehydrogenase family protein
AT4G21650	Subtilase family protein
AT4G21760	beta-glucosidase 47(BGLU47)
AT4G22360	SWIB complex BAF60b domain-containing protein
AT4G22670	HSP70-interacting protein 1(HIP1)
AT4G22730	Leucine-rich repeat protein kinase family protein
AT4G22750	DHHC-type zinc finger protein
AT4G22860	Cell cycle regulated microtubule associated protein
AT4G23230	cysteine-rich RECEPTOR-like kinase(CRK15)
AT4G23430	NAD(P)-binding Rossmann-fold superfamily protein(Tic32-IVa)
AT4G23570	phosphatase-like protein(SGT1A)
AT4G23630	VIRB2-interacting protein 1(BTI1)
AT4G23730	Galactose mutarotase-like superfamily protein
AT4G23850	AMP-dependent synthetase and ligase family protein(LACS4)
AT4G24000	cellulose synthase like G2(CSLG2)
AT4G24010	cellulose synthase like G1(CSLG1)
AT4G24320	Ubiquitin carboxyl-terminal hydrolase family protein
AT4G25270	Tetratricopeptide repeat (TPR)-like superfamily protein(OTP70)
AT4G25900	Galactose mutarotase-like superfamily protein
AT4G26000	RNA-binding KH domain-containing protein(PEP)
AT4G26080	Protein phosphatase 2C family protein(ABI1)
AT4G26190	Haloacid dehalogenase-like hydrolase (HAD) superfamily protein
AT4G26490	Late embryogenesis abundant (LEA) hydroxyproline-rich glycoprotein family
AT4G26510	uridine kinase-like 4(UKL4)
AT4G26530	Aldolase superfamily protein(FBA5)
AT4G26550	Got1/Sft2-like vescicle transport protein family
AT4G26610	D6 protein kinase like 1(D6PKL1)
AT4G26660	kinesin-like protein
AT4G27435	fiber (DUF1218)
AT4G27480	Core-2/I-branching beta-1,6-N-acetylglucosaminyltransferase family protein
AT4G27690	vacuolar protein sorting 26B(VPS26B)
AT4G27750	binding protein(ISI1)
AT4G27760	NAD(P)-binding Rossmann-fold superfamily protein(FEY)
AT4G28080	Tetratricopeptide repeat (TPR)-like superfamily protein
AT4G28220	NAD(P)H dehydrogenase B1(NDB1)
AT4G28730	Glutaredoxin family protein(GrxC5)
AT4G28780	GDSL-like Lipase/Acylhydrolase superfamily protein
AT4G28890	RING/U-box superfamily protein
AT4G29130	hexokinase 1(HXK1)
AT4G29210	gamma-glutamyl transpeptidase 4(GGT4)
AT4G29220	phosphofructokinase 1(PFK1)
AT4G29520	nucleophosmin
AT4G29670	atypical CYS HIS rich thioredoxin 2(ACHT2)
AT4G29680	Alkaline-phosphatase-like family protein
AT4G29900	autoinhibited Ca(2+)-ATPase 10(ACA10)
AT4G30360	cyclic nucleotide-gated channel 17(CNGC17)
AT4G30420	nodulin MtN21 /EamA-like transporter family protein(UMAMIT34)
AT4G30520	Leucine-rich repeat protein kinase family protein(SARK)
AT4G30610	alpha/beta-Hydrolases superfamily protein(BRS1)
AT4G30700	Pentatricopeptide repeat (PPR) superfamily protein(MEF29)
AT4G30920	Cytosol aminopeptidase family protein(LAP2)
AT4G30960	SOS3-interacting protein 3(SIP3)
AT4G31020	alpha/beta-Hydrolases superfamily protein
AT4G31080	integral membrane metal-binding family protein (DUF2296)
AT4G31120	SHK1 binding protein 1(SKB1)
AT4G31130	keratin-associated protein (DUF1218)
AT4G31140	O-Glycosyl hydrolases family 17 protein
AT4G31440	transcriptional regulator of RNA polII, SAGA, subunit
AT4G31880	transcriptional regulator
AT4G31940	cytochrome P450, family 82, subfamily C, polypeptide 4(CYP82C4)
AT4G32000	Protein kinase superfamily protein
AT4G32070	Octicosapeptide/Phox/Bem1p (PB1) domain-containing protein / tetratricopeptide repeat (TPR)-containing protein(Phox4)
AT4G32250	Protein kinase superfamily protein
AT4G32260	ATPase, F0 complex, subunit B/B', bacterial/chloroplast(PDE334)
AT4G32300	S-domain-2 5(SD2-5)
AT4G32480	sugar phosphate exchanger, putative (DUF506)
AT4G32551	transcriptional corepressor LEUNIG(LUG)
AT4G32700	MUS308 and mammalian DNA polymerase-like protein
AT4G32810	carotenoid cleavage dioxygenase 8(CCD8)
AT4G32840	phosphofructokinase 6(PFK6)
AT4G32850	nuclear poly(a) polymerase(nPAP)
AT4G33070	Thiamine pyrophosphate dependent pyruvate decarboxylase family protein
AT4G33100	protein phosphatase
AT4G33110	S-adenosyl-L-methionine-dependent methyltransferases superfamily protein
AT4G33170	Tetratricopeptide repeat (TPR)-like superfamily protein
AT4G33270	Transducin family protein / WD-40 repeat family protein(CDC20.1)
AT4G33360	NAD(P)-binding Rossmann-fold superfamily protein(FLDH)
AT4G33420	Peroxidase superfamily protein
AT4G33430	BRI1-associated receptor kinase(BAK1)
AT4G33470	histone deacetylase 14(HDA14)
AT4G33490	Eukaryotic aspartyl protease family protein
AT4G33770	Inositol 1,3,4-trisphosphate 5/6-kinase family protein
AT4G33840	Glycosyl hydrolase family 10 protein
AT4G34060	demeter-like protein 3(DML3)
AT4G34140	D111/G-patch domain-containing protein
AT4G34350	4-hydroxy-3-methylbut-2-enyl diphosphate reductase(HDR)
AT4G34440	Protein kinase superfamily protein(PERK5)
AT4G34450	coatomer gamma-2 subunit, putative / gamma-2 coat protein, putative / gamma-2 COP
AT4G34480	O-Glycosyl hydrolases family 17 protein
AT4G34490	cyclase associated protein 1(CAP1)
AT4G34860	Plant neutral invertase family protein(A/N-InvB)
AT4G34870	rotamase cyclophilin 5(ROC5)
AT4G34880	Amidase family protein
AT4G34910	P-loop containing nucleoside triphosphate hydrolases superfamily protein
AT4G34940	armadillo repeat only 1(ARO1)
AT4G34960	Cyclophilin-like peptidyl-prolyl cis-trans isomerase family protein
AT4G35030	Protein kinase superfamily protein
AT4G35170	Late embryogenesis abundant (LEA) hydroxyproline-rich glycoprotein family
AT4G35230	BR-signaling kinase 1(BSK1)
AT4G35420	dihydroflavonol 4-reductase-like1(DRL1)
AT4G35800	RNA polymerase II large subunit(NRPB1)
AT4G36020	cold shock domain protein 1(CSDP1)
AT4G36180	Leucine-rich receptor-like protein kinase family protein
AT4G36250	aldehyde dehydrogenase 3F1(ALDH3F1)
AT4G36490	SEC14-like 12(SFH12)
AT4G36630	Vacuolar sorting protein 39(EMB2754)
AT4G36760	aminopeptidase P1(APP1)
AT4G36860	LIM domain-containing protein
AT4G36870	BEL1-like homeodomain 2(BLH2)
AT4G36940	nicotinate phosphoribosyltransferase 1(NAPRT1)
AT4G37180	Homeodomain-like superfamily protein
AT4G37190	plasma membrane, autoregulation-binding site, misato segment II, myosin-like, tubulin/FtsZ protein
AT4G37370	cytochrome P450, family 81, subfamily D, polypeptide 8(CYP81D8)
AT4G37490	CYCLIN B1;1(CYCB1;1)
AT4G37640	calcium ATPase 2(ACA2)
AT4G37900	hypothetical protein (duplicated DUF1399)
AT4G37920	endoribonuclease E-like protein
AT4G38180	FAR1-related sequence 5(FRS5)
AT4G38190	cellulose synthase like D4(CSLD4)
AT4G38225	glycerol kinase
AT4G38260	transport/golgi organization-like protein (DUF833)
AT4G38270	galacturonosyltransferase 3(GAUT3)
AT4G38580	farnesylated protein 6(FP6)
AT4G38600	HECT ubiquitin protein ligase family protein KAK(KAK)
AT4G38640	Plasma-membrane choline transporter family protein
AT4G38650	Glycosyl hydrolase family 10 protein
AT4G38690	PLC-like phosphodiesterases superfamily protein
AT4G38810	Calcium-binding EF-hand family protein
AT4G38950	ATP binding microtubule motor family protein
AT4G38970	fructose-bisphosphate aldolase 2(FBA2)
AT4G39090	Papain family cysteine protease(RD19)
AT4G39420	spatacsin carboxy-terminus protein
AT4G39540	shikimate kinase 2(SK2)
AT4G39952	Pentatricopeptide repeat (PPR) superfamily protein
AT4G40050	signal transducer, putative (DUF3550/UPF0682)
AT5G01160	RING/U-box superfamily protein
AT5G01180	peptide transporter 5(PTR5)
AT5G01430	Got1/Sft2-like vescicle transport protein family
AT5G01520	RING/U-box superfamily protein(AIRP2)
AT5G01710	methyltransferase
AT5G01810	CBL-interacting protein kinase 15(CIPK15)
AT5G01850	Protein kinase superfamily protein
AT5G01930	Glycosyl hydrolase superfamily protein(MAN6)
AT5G01950	Leucine-rich repeat protein kinase family protein
AT5G01960	RING/U-box superfamily protein
AT5G01980	RING/U-box superfamily protein
AT5G02070	Protein kinase family protein
AT5G02170	Transmembrane amino acid transporter family protein
AT5G02230	Haloacid dehalogenase-like hydrolase (HAD) superfamily protein
AT5G02880	ubiquitin-protein ligase 4(UPL4)
AT5G02960	Ribosomal protein S12/S23 family protein
AT5G03330	Cysteine proteinases superfamily protein
AT5G03490	UDP-Glycosyltransferase superfamily protein
AT5G03500	Mediator complex, subunit Med7
AT5G03720	heat shock transcription factor A3(HSFA3)
AT5G03810	GDSL-like Lipase/Acylhydrolase family protein
AT5G03820	GDSL-like Lipase/Acylhydrolase family protein
AT5G03980	SGNH hydrolase-type esterase superfamily protein
AT5G04050	RNA-directed DNA polymerase (reverse transcriptase)
AT5G04200	metacaspase 9(MC9)
AT5G04280	RNA-binding (RRM/RBD/RNP motifs) family protein with retrovirus zinc finger-like domain-containing protein(AtRZ-1c)
AT5G04500	glycosyltransferase family protein 47
AT5G04510	3'-phosphoinositide-dependent protein kinase 1(PDK1)
AT5G04590	sulfite reductase(SIR)
AT5G04780	Pentatricopeptide repeat (PPR) superfamily protein
AT5G04885	Glycosyl hydrolase family protein
AT5G04920	EAP30/Vps36 family protein
AT5G04980	DNAse I-like superfamily protein
AT5G05010	clathrin adaptor complexes medium subunit family protein
AT5G05230	RING/U-box superfamily protein
AT5G05510	Mad3/BUB1 homology region 1
AT5G05540	small RNA degrading nuclease 2(SDN2)
AT5G05680	nuclear pore complex protein-like protein(MOS7)
AT5G06160	splicing factor-like protein(ATO)
AT5G06300	Putative lysine decarboxylase family protein(LOG7)
AT5G06420	Zinc finger (CCCH-type/C3HC4-type RING finger) family protein
AT5G06680	spindle pole body component 98(SPC98)
AT5G06740	Concanavalin A-like lectin protein kinase family protein
AT5G06770	KH domain-containing protein / zinc finger (CCCH type) family protein
AT5G06810	transcription termination factor family protein
AT5G06860	polygalacturonase inhibiting protein 1(PGIP1)
AT5G06970	plant/protein (DUF810)
AT5G07030	Eukaryotic aspartyl protease family protein
AT5G07440	glutamate dehydrogenase 2(GDH2)
AT5G07460	peptidemethionine sulfoxide reductase 2(PMSR2)
AT5G07810	SNF2 domain-containing protein / helicase domain-containing protein / HNH endonuclease domain-containing protein
AT5G07900	Mitochondrial transcription termination factor family protein
AT5G08420	RNA-binding KH domain-containing protein
AT5G08470	peroxisome 1(PEX1)
AT5G08510	Pentatricopeptide repeat (PPR) superfamily protein
AT5G08610	P-loop containing nucleoside triphosphate hydrolases superfamily protein(PDE340)
AT5G08640	flavonol synthase 1(FLS1)
AT5G09660	peroxisomal NAD-malate dehydrogenase 2(PMDH2)
AT5G09690	magnesium transporter 7(MGT7)
AT5G09870	cellulose synthase 5(CESA5)
AT5G09880	Splicing factor, CC1-like protein
AT5G09930	ABC transporter family protein(ABCF2)
AT5G09950	Tetratricopeptide repeat (TPR)-like superfamily protein(MEF7)
AT5G10240	asparagine synthetase 3(ASN3)
AT5G10540	Zincin-like metalloproteases family protein
AT5G10550	global transcription factor group E2(GTE2)
AT5G10610	cytochrome P450, family 81, subfamily K, polypeptide 1(CYP81K1)
AT5G10630	Translation elongation factor EF1A/initiation factor IF2gamma family protein
AT5G10730	NAD(P)-binding Rossmann-fold superfamily protein
AT5G10870	chorismate mutase 2(CM2)
AT5G11000	hypothetical protein (DUF868)
AT5G11100	Calcium-dependent lipid-binding (CaLB domain) family protein(SYTD)
AT5G11110	sucrose phosphate synthase 2F(SPS2F)
AT5G11950	Putative lysine decarboxylase family protein(LOG8)
AT5G12300	Calcium-dependent lipid-binding (CaLB domain) family protein
AT5G12350	Regulator of chromosome condensation (RCC1) family with FYVE zinc finger domain-containing protein
AT5G12410	THUMP domain-containing protein
AT5G12430	Heat shock protein DnaJ with tetratricopeptide repeat-containing protein(TPR16)
AT5G12460	fringe-like protein (DUF604)
AT5G12950	proline-tRNA ligase (DUF1680)
AT5G13020	Emsy N Terminus (ENT)/ plant Tudor-like domains-containing protein(EML3)
AT5G13190	GSH-induced LITAF domain protein(GILP)
AT5G13230	Tetratricopeptide repeat (TPR)-like superfamily protein
AT5G13260	myosin
AT5G13270	Pentatricopeptide repeat (PPR) superfamily protein(RARE1)
AT5G13300	ARF GTPase-activating protein(SFC)
AT5G13400	Major facilitator superfamily protein
AT5G13430	Ubiquinol-cytochrome C reductase iron-sulfur subunit
AT5G13500	Hyp O-arabinosyltransferase-like protein
AT5G13700	polyamine oxidase 1(PAO1)
AT5G13750	zinc induced facilitator-like 1(ZIFL1)
AT5G13810	Glutaredoxin family protein
AT5G13840	FIZZY-related 3(FZR3)
AT5G13870	xyloglucan endotransglucosylase/hydrolase 5(XTH5)
AT5G13930	Chalcone and stilbene synthase family protein(TT4)
AT5G13980	Glycosyl hydrolase family 38 protein
AT5G14150	Emb:.1 protein, putative (Protein of unknown function, DUF642)
AT5G14230	ankyrin
AT5G14280	DNA-binding storekeeper-like protein
AT5G14740	carbonic anhydrase 2(CA2)
AT5G14780	formate dehydrogenase(FDH)
AT5G14800	pyrroline-5- carboxylate (P5C) reductase(P5CR)
AT5G14880	Potassium transporter family protein
AT5G14970	seed maturation-like protein
AT5G15070	Phosphoglycerate mutase-like family protein
AT5G15400	U-box domain-containing protein
AT5G15700	DNA/RNA polymerases superfamily protein
AT5G15720	GDSL-motif lipase 7(GLIP7)
AT5G15780	Pollen Ole e 1 allergen and extensin family protein
AT5G15810	tRNA (guanine(26)-N(2))-dimethyltransferase
AT5G16010	3-oxo-5-alpha-steroid 4-dehydrogenase family protein
AT5G16400	thioredoxin F2(TRXF2)
AT5G16520	transmembrane protein
AT5G17070	serine/threonine-protein phosphatase 4 regulatory subunit-like protein
AT5G17220	glutathione S-transferase phi 12(GSTF12)
AT5G17420	Cellulose synthase family protein(IRX3)
AT5G17520	root cap 1 (RCP1)(RCP1)
AT5G17600	RING/U-box superfamily protein
AT5G17780	alpha/beta-Hydrolases superfamily protein
AT5G18280	apyrase 2(APY2)
AT5G18470	Curculin-like (mannose-binding) lectin family protein
AT5G18580	tonneau 2 (TON2)(FASS)
AT5G18650	CHY-type/CTCHY-type/RING-type Zinc finger protein
AT5G18670	beta-amylase 3(BMY3)
AT5G19070	SNARE associated Golgi protein family
AT5G19200	NAD(P)-binding Rossmann-fold superfamily protein(TSC10B)
AT5G19320	RAN GTPase activating protein 2(RANGAP2)
AT5G19330	ARM repeat protein interacting with ABF2(ARIA)
AT5G19410	ABC-2 type transporter family protein(ABCG23)
AT5G19760	Mitochondrial substrate carrier family protein
AT5G19860	transmembrane protein, putative (Protein of unknown function, DUF538)
AT5G20250	Raffinose synthase family protein(DIN10)
AT5G20480	EF-TU receptor(EFR)
AT5G20510	alfin-like 5(AL5)
AT5G20570	RING-box 1(RBX1)
AT5G20840	Phosphoinositide phosphatase family protein
AT5G20890	TCP-1/cpn60 chaperonin family protein
AT5G20950	Glycosyl hydrolase family protein
AT5G21040	F-box protein 2(FBX2)
AT5G21060	Glyceraldehyde-3-phosphate dehydrogenase-like family protein
AT5G21160	LA RNA-binding protein(LARP1a)
AT5G21222	protein kinase family protein
AT5G21930	P-type ATPase of Arabidopsis 2(PAA2)
AT5G22060	DNAJ homologue 2(J2)
AT5G22350	fission ELM1-like protein (DUF1022)(ELM1)
AT5G22450	spectrin beta chain, brain
AT5G22480	ZPR1 zinc-finger domain protein
AT5G22810	GDSL-like lipase/acylhydrolase superfamily protein
AT5G22840	Protein kinase superfamily protein
AT5G23190	cytochrome P450, family 86, subfamily B, polypeptide 1(CYP86B1)
AT5G23240	DNAJ heat shock N-terminal domain-containing protein
AT5G23710	DNA binding / DNA-directed RNA polymerase
AT5G23810	amino acid permease 7(AAP7)
AT5G24010	Protein kinase superfamily protein
AT5G24080	Protein kinase superfamily protein
AT5G24750	UDP-Glycosyltransferase superfamily protein
AT5G24760	GroES-like zinc-binding dehydrogenase family protein
AT5G24810	ABC1 family protein
AT5G25265	Hyp O-arabinosyltransferase-like protein
AT5G25350	EIN3-binding F box protein 2(EBF2)
AT5G25590	DNA ligase (DUF630 and DUF632)
AT5G26160	light-independent protochlorophyllide reductase subunit
AT5G26180	S-adenosyl-L-methionine-dependent methyltransferases superfamily protein
AT5G26220	ChaC-like family protein
AT5G26600	Pyridoxal phosphate (PLP)-dependent transferases superfamily protein
AT5G26667	P-loop containing nucleoside triphosphate hydrolases superfamily protein(PYR6)
AT5G26742	DEAD box RNA helicase (RH3)(emb1138)
AT5G26960	Galactose oxidase/kelch repeat superfamily protein
AT5G27110	Tetratricopeptide repeat (TPR)-like superfamily protein
AT5G27240	DNAJ heat shock N-terminal domain-containing protein
AT5G27540	MIRO-related GTP-ase 1(MIRO1)
AT5G27740	ATPase family associated with various cellular activities (AAA)(EMB2775)
AT5G27870	Plant invertase/pectin methylesterase inhibitor superfamily
AT5G27930	Protein phosphatase 2C family protein
AT5G28050	Cytidine/deoxycytidylate deaminase family protein
AT5G28150	hypothetical protein (DUF868)
AT5G28290	NIMA-related kinase 3(NEK3)
AT5G28460	Pentatricopeptide repeat (PPR) superfamily protein
AT5G28640	SSXT family protein(AN3)
AT5G32440	Ubiquitin system component Cue protein
AT5G32470	heme oxygenase-like, multi-helical
AT5G35370	S-locus lectin protein kinase family protein
AT5G35380	kinase with adenine nucleotide alpha hydrolases-like domain-containing protein
AT5G35530	Ribosomal protein S3 family protein
AT5G35735	Auxin-responsive family protein
AT5G35960	Protein kinase family protein
AT5G36670	RING/FYVE/PHD zinc finger superfamily protein
AT5G36740	Acyl-CoA N-acyltransferase with RING/FYVE/PHD-type zinc finger protein
AT5G36930	Disease resistance protein (TIR-NBS-LRR class) family
AT5G37020	auxin response factor 8(ARF8)
AT5G37150	P-loop containing nucleoside triphosphate hydrolases superfamily protein
AT5G37500	gated outwardly-rectifying K+ channel(GORK)
AT5G37710	alpha/beta-Hydrolases superfamily protein
AT5G38690	Zinc-finger domain of monoamine-oxidase A repressor R1 protein
AT5G38840	SMAD/FHA domain-containing protein
AT5G39350	Tetratricopeptide repeat (TPR)-like superfamily protein
AT5G39500	GNOM-like 1(GNL1)
AT5G39680	Pentatricopeptide repeat (PPR) superfamily protein(EMB2744)
AT5G39950	thioredoxin 2(TRX2)
AT5G40380	cysteine-rich RLK (RECEPTOR-like protein kinase) 42(CRK42)
AT5G40405	Tetratricopeptide repeat (TPR)-like superfamily protein
AT5G40470	RNI-like superfamily protein
AT5G40540	Protein kinase superfamily protein
AT5G40990	GDSL lipase 1(GLIP1)
AT5G41050	Pollen Ole e 1 allergen and extensin family protein
AT5G41070	dsRNA-binding protein 5(DRB5)
AT5G41170	Pentatricopeptide repeat (PPR-like) superfamily protein
AT5G41360	homolog of Xeroderma pigmentosum complementation group B 2(XPB2)
AT5G41370	DNA repair helicase XPB1-like protein(XPB1)
AT5G41410	POX (plant homeobox) family protein(BEL1)
AT5G41650	Lactoylglutathione lyase / glyoxalase I family protein
AT5G41970	Metal-dependent protein hydrolase
AT5G42250	Zinc-binding alcohol dehydrogenase family protein
AT5G42340	Plant U-Box 15(PUB15)
AT5G42400	SET domain protein 25(SDG25)
AT5G42450	Pentatricopeptide repeat (PPR) superfamily protein
AT5G42560	Abscisic acid-responsive (TB2/DP1, HVA22) family protein
AT5G43140	Peroxisomal membrane 22 kDa (Mpv17/PMP22) family protein
AT5G43190	Galactose oxidase/kelch repeat superfamily protein
AT5G43790	Pentatricopeptide repeat (PPR) superfamily protein
AT5G44030	cellulose synthase A4(CESA4)
AT5G44110	P-loop containing nucleoside triphosphate hydrolases superfamily protein(ABCI21)
AT5G44480	NAD(P)-binding Rossmann-fold superfamily protein(DUR)
AT5G45030	Trypsin family protein
AT5G45110	NPR1-like protein 3(NPR3)
AT5G45290	RING/U-box superfamily protein
AT5G45400	Replication factor-A protein 1-like protein(RPA70C)
AT5G45430	Protein kinase superfamily protein
AT5G45560	Pleckstrin homology (PH) domain-containing protein / lipid-binding START domain-containing protein
AT5G45580	Homeodomain-like superfamily protein
AT5G45775	Ribosomal L5P family protein
AT5G45820	CBL-interacting protein kinase 20(CIPK20)
AT5G45830	delay of germination 1(DOG1)
AT5G45950	GDSL-like Lipase/Acylhydrolase superfamily protein
AT5G46050	peptide transporter 3(PTR3)
AT5G46090	transmembrane protein, putative (DUF679)
AT5G46190	RNA-binding KH domain-containing protein
AT5G46240	1(KAT1)
AT5G46540	P-glycoprotein 7(ABCB7)
AT5G46650	RING/U-box superfamily protein
AT5G47360	Tetratricopeptide repeat (TPR)-like superfamily protein
AT5G47400	sphingomyelin phosphodiesterase
AT5G47435	formyltetrahydrofolate deformylase
AT5G47660	Homeodomain-like superfamily protein
AT5G47800	Phototropic-responsive NPH3 family protein
AT5G48385	FRIGIDA-like protein
AT5G48740	Leucine-rich repeat protein kinase family protein
AT5G48750	Cytochrome b561/ferric reductase transmembrane with DOMON related domain-containing protein
AT5G48940	Leucine-rich repeat transmembrane protein kinase family protein
AT5G48970	Mitochondrial substrate carrier family protein
AT5G49160	methyltransferase 1(MET1)
AT5G49630	amino acid permease 6(AAP6)
AT5G49690	UDP-Glycosyltransferase superfamily protein
AT5G49760	Leucine-rich repeat protein kinase family protein
AT5G49890	chloride channel C(CLC-C)
AT5G49910	chloroplast heat shock protein 70-2(cpHsc70-2)
AT5G50130	NAD(P)-binding Rossmann-fold superfamily protein
AT5G50180	Protein kinase superfamily protein
AT5G50240	protein-l-isoaspartate methyltransferase 2(PIMT2)
AT5G50250	chloroplast RNA-binding protein 31B(CP31B)
AT5G50650	Transducin/WD40 repeat-like superfamily protein
AT5G50690	hydroxysteroid dehydrogenase 7(HSD7)
AT5G50700	hydroxysteroid dehydrogenase 1(HSD1)
AT5G50860	Protein kinase superfamily protein
AT5G50960	nucleotide binding protein 35(NBP35)
AT5G51020	crumpled leaf(CRL)
AT5G51100	Fe superoxide dismutase 2(FSD2)
AT5G51260	HAD superfamily, subfamily IIIB acid phosphatase
AT5G51330	SWITCH1(SWI1)
AT5G51670	hypothetical protein (DUF668)
AT5G51750	subtilase 1.3(SBT1.3)
AT5G51810	gibberellin 20 oxidase 2(GA20OX2)
AT5G51830	pfkB-like carbohydrate kinase family protein
AT5G51890	Peroxidase superfamily protein
AT5G51920	Pyridoxal phosphate (PLP)-dependent transferases superfamily protein
AT5G52100	Dihydrodipicolinate reductase, bacterial/plant(CRR1)
AT5G52260	myb domain protein 19(MYB19)
AT5G52390	PAR1 protein
AT5G52410	oxidoreductase/transition metal ion-binding protein
AT5G52630	mitochondrial RNAediting factor 1(MEF1)
AT5G53580	NAD(P)-linked oxidoreductase superfamily protein(PLR1)
AT5G53970	Tyrosine transaminase family protein(TAT7)
AT5G54130	Calcium-binding endonuclease/exonuclease/phosphatase family
AT5G54190	protochlorophyllide oxidoreductase A(PORA)
AT5G54310	ARF-GAP domain 5(AGD5)
AT5G54390	HAL2-like protein(HL)
AT5G54400	S-adenosyl-L-methionine-dependent methyltransferases superfamily protein
AT5G54630	zinc finger protein-like protein
AT5G54670	kinesin 3(ATK3)
AT5G54860	Major facilitator superfamily protein
AT5G54960	pyruvate decarboxylase-2(PDC2)
AT5G55040	DNA-binding bromodomain-containing protein
AT5G55090	mitogen-activated protein kinase kinase kinase 15(MAPKKK15)
AT5G55840	PPR superfamily protein
AT5G55920	S-adenosyl-L-methionine-dependent methyltransferases superfamily protein(OLI2)
AT5G55970	RING/U-box superfamily protein
AT5G56050	late embryogenesis abundant (LEA) hydroxyproline-rich glycoprotein family protein
AT5G56120	RNA polymerase II elongation factor
AT5G56290	peroxin 5(PEX5)
AT5G56310	Pentatricopeptide repeat (PPR) superfamily protein
AT5G56630	phosphofructokinase 7(PFK7)
AT5G57020	myristoyl-CoA:protein N-myristoyltransferase(NMT1)
AT5G57110	autoinhibited Ca2+ -ATPase(ACA8)
AT5G57130	Clp amino terminal domain-containing protein
AT5G57160	DNA ligase IV(ATLIG4)
AT5G57300	S-adenosyl-L-methionine-dependent methyltransferases superfamily protein
AT5G57360	Galactose oxidase/kelch repeat superfamily protein(ZTL)
AT5G57390	AINTEGUMENTA-like 5(AIL5)
AT5G57740	hypothetical protein(XBAT32)
AT5G57870	MIF4G domain-containing protein / MA3 domain-containing protein(eIFiso4G1)
AT5G58230	Transducin/WD40 repeat-like superfamily protein(MSI1)
AT5G58290	regulatory particle triple-A ATPase 3(RPT3)
AT5G58320	Kinase interacting (KIP1-like) family protein(NET4A)
AT5G58380	SOS3-interacting protein 1(SIP1)
AT5G58450	Tetratricopeptide repeat (TPR)-like superfamily protein
AT5G58610	PHD finger transcription factor
AT5G58860	cytochrome P450, family 86, subfamily A, polypeptide 1(CYP86A1)
AT5G58870	FTSH protease 9(ftsh9)
AT5G58940	calmodulin-binding receptor-like cytoplasmic kinase 1(CRCK1)
AT5G59160	type one serine/threonine protein phosphatase 2(TOPP2)
AT5G59200	Tetratricopeptide repeat (TPR)-like superfamily protein(OTP80)
AT5G59210	myosin heavy chain-like protein
AT5G59240	Ribosomal protein S8e family protein
AT5G59600	Tetratricopeptide repeat (TPR)-like superfamily protein
AT5G59700	Protein kinase superfamily protein
AT5G59810	Subtilase family protein(SBT5.4)
AT5G59900	Pentatricopeptide repeat (PPR) superfamily protein
AT5G60230	splicing endonuclease 2(SEN2)
AT5G60410	DNA-binding protein with MIZ/SP-RING zinc finger, PHD-finger and SAP domain-containing protein(SIZ1)
AT5G61050	histone deacetylase-related / HD-like protein
AT5G61060	histone deacetylase 5(HDA05)
AT5G61440	atypical CYS HIS rich thioredoxin 5(ACHT5)
AT5G61450	P-loop containing nucleoside triphosphate hydrolases superfamily protein
AT5G61550	U-box domain-containing protein kinase family protein
AT5G61570	Protein kinase superfamily protein
AT5G61670	orange protein
AT5G61800	Pentatricopeptide repeat (PPR) superfamily protein
AT5G62180	carboxyesterase 20(CXE20)
AT5G62230	ERECTA-like 1(ERL1)
AT5G62570	Calmodulin binding protein-like protein
AT5G62910	RING/U-box superfamily protein
AT5G62990	Ubiquitin carboxyl-terminal hydrolase family protein(emb1692)
AT5G63190	MA3 domain-containing protein
AT5G63380	AMP-dependent synthetase and ligase family protein
AT5G63420	RNA-metabolising metallo-beta-lactamase family protein(emb2746)
AT5G63450	cytochrome P450, family 94, subfamily B, polypeptide 1(CYP94B1)
AT5G63920	topoisomerase 3alpha(TOP3A)
AT5G63970	Copine (Calcium-dependent phospholipid-binding protein) family(RGLG3)
AT5G63980	SAL1 phosphatase-like protein(SAL1)
AT5G64150	RNA methyltransferase family protein
AT5G64170	dentin sialophosphoprotein-like protein
AT5G64200	serine/arginine-rich splicing factor-like protein, putative(SC35)
AT5G64270	splicing factor
AT5G64280	dicarboxylate transporter 2.2(DiT2.2)
AT5G64410	oligopeptide transporter 4(OPT4)
AT5G64460	Phosphoglycerate mutase family protein
AT5G65010	asparagine synthetase 2(ASN2)
AT5G65090	DNAse I-like superfamily protein(BST1)
AT5G65440	transmembrane protein
AT5G65460	kinesin like protein for actin based chloroplast movement 2(KAC2)
AT5G65500	U-box domain-containing protein kinase family protein
AT5G65630	global transcription factor group E7(GTE7)
AT5G65710	HAESA-like 2(HSL2)
AT5G65790	myb domain protein 68(MYB68)
AT5G65820	Pentatricopeptide repeat (PPR) superfamily protein
AT5G65900	DEA(D/H)-box RNA helicase family protein
AT5G65980	Auxin efflux carrier family protein
AT5G66055	ankyrin repeat protein(AKRP)
AT5G66060	2-oxoglutarate (2OG) and Fe(II)-dependent oxygenase superfamily protein
AT5G66180	S-adenosyl-L-methionine-dependent methyltransferases superfamily protein
AT5G66280	GDP-D-mannose 4,6-dehydratase 1(GMD1)
AT5G66430	S-adenosyl-L-methionine-dependent methyltransferases superfamily protein
AT5G66720	Protein phosphatase 2C family protein
AT5G66790	Protein kinase superfamily protein
AT5G66820	transmembrane protein
AT5G66850	mitogen-activated protein kinase kinase kinase 5(MAPKKK5)
AT5G66880	sucrose nonfermenting 1(SNF1)-related protein kinase 2.3(SNRK2.3)
AT5G67150	HXXXD-type acyl-transferase family protein
AT5G67180	target of early activation tagged (EAT) 3(TOE3)
AT5G67630	P-loop containing nucleoside triphosphate hydrolases superfamily protein
AT3G27130	P-loop containing nucleoside triphosphate hydrolases superfamily protein
ATMG00730	cytochrome c oxidase subunit 3
ATMG00480	subunit 8 of the mitochondrial F(O) ATP synthase complex
ATCG00270	PSII D2 protein
ATCG00020	chlorophyll binding protein D1, a part of the photosystem II reaction center core

## Sheet: Enriched GO terms
GO	Description	LogP_Dicotyledons	LogP_Non-dicotyledons
GO:0004712	protein serine/threonine/tyrosine kinase activity	-2.79041	-2.01467
GO:0016556	mRNA modification	-2.86203	-2.50134
GO:0019199	transmembrane receptor protein kinase activity	-3.30793	-2.0043
GO:0016887	ATPase activity	-10.0943	-2.67142
GO:0009451	RNA modification	-18.6539	-2.08525
GO:0080167	response to karrikin	-2.28095	0
GO:0009651	response to salt stress	-2.16805	0
GO:0010214	seed coat development	-2.43656	0
GO:0031408	oxylipin biosynthetic process	-2.21653	0
GO:0017136	NAD-dependent histone deacetylase activity	-2.07813	0
GO:0033218	amide binding	-2.52219	0
GO:0010540	basipetal auxin transport	-2.77711	0
GO:0032787	monocarboxylic acid metabolic process	-2.50298	0
GO:0009617	response to bacterium	-2.34557	0
GO:0016042	lipid catabolic process	-2.74906	0
GO:0072525	pyridine-containing compound biosynthetic process	-2.48567	0
GO:0071216	cellular response to biotic stimulus	-2.07813	0
GO:0009756	carbohydrate mediated signaling	-2.81983	0
GO:0050777	negative regulation of immune response	-2.4189	0
GO:0051512	positive regulation of unidimensional cell growth	-2.19706	0
GO:0008353	RNA polymerase II CTD heptapeptide repeat kinase activity	-2.01706	0
GO:0004351	glutamate decarboxylase activity	-2.19706	0
GO:0046132	pyrimidine ribonucleoside biosynthetic process	-2.4189	0
GO:0008235	metalloexopeptidase activity	-2.39991	0
GO:0034485	phosphatidylinositol-3,4,5-trisphosphate 5-phosphatase activity	-2.39991	0
GO:0034762	regulation of transmembrane transport	-2.30136	0
GO:0008865	fructokinase activity	-2.6498	0
GO:0034976	response to endoplasmic reticulum stress	-2.78907	0
GO:0004724	magnesium-dependent protein serine/threonine phosphatase activity	-2.39182	0
GO:0047274	galactinol-sucrose galactosyltransferase activity	-2.47417	0
GO:0000266	mitochondrial fission	-2.50008	0
GO:0016741	transferase activity, transferring one-carbon groups	-2.04991	0
GO:0005388	calcium-transporting ATPase activity	-2.36367	0
GO:0019104	DNA N-glycosylase activity	-3.32448	0
GO:0016616	oxidoreductase activity, acting on the CH-OH group of donors, NAD or NADP as acceptor	-3.00827	0
GO:0048585	negative regulation of response to stimulus	-3.69365	0
GO:0045330	aspartyl esterase activity	-3.59574	0
GO:0004386	helicase activity	-3.44534	0
GO:2000037	regulation of stomatal complex patterning	-3.71822	0
GO:0009636	response to toxic substance	-3.04817	0
GO:0002832	negative regulation of response to biotic stimulus	-3.87832	0
GO:0032989	cellular component morphogenesis	-3.85556	0
GO:0018230	peptidyl-L-cysteine S-palmitoylation	-3.32448	0
GO:0042938	dipeptide transport	-3.44398	0
GO:0030258	lipid modification	-4.11199	0
GO:1901701	cellular response to oxygen-containing compound	-5.16695	0
GO:0044093	positive regulation of molecular function	-4.1112	0
GO:0015693	magnesium ion transport	-4.57714	0
GO:0016760	cellulose synthase (UDP-forming) activity	-6.12808	0
GO:0046777	protein autophosphorylation	-9.95207	0
GO:0008017	microtubule binding	-6.93881	0
GO:0003002	regionalization	0	-2.09428
GO:0002229	defense response to oomycetes	0	-2.37932
GO:0004252	serine-type endopeptidase activity	0	-2.08518
GO:0044426	cell wall part	0	-2.86807
GO:0010027	thylakoid membrane organization	0	-2.40134
GO:0009798	axis specification	0	-5.58391
