# Supplementary material for: Cross-Species Annotation of Expressed Genes and Detection of Different Functional Gene Modules Between 10 Cold- and 10 Hot-Propertied Chinese Herbal Medicines
Source: Front Genet. 2020 Jun 18;11:532. doi: 10.3389/fgene.2020.00532 (PMC7314971; doi:10.3389/fgene.2020.00532)
Supplement: DATA S5 — HMs property-specific compounds and the metabolic pathways. [file Table_5.XLSX]

## Sheet: Cold_compounds
cold1	cold2	cold3	cold4	cold5	cold6	cold7	cold8	cold9	cold10
Purpureaside C	Rosmarinic acid	Dihydrooroxylin A	Persicarin	14-Deoxy-11,12-Didehydroandrographolide	Swertiamarin	Ursolic Acid	Crocetin	Menthyl Acetate	Indirubin
Ajugoside	galuteolin	Sebacic Acid	Inositol	Deoxypeganine	Orcinol-β-D-glucoside	Trifloroside	Geniposide	Inositol	Indigotin
Rehmannioside A	diosmetin-7-O-glucopyranoside	Chrysin	Swertiajaponin	Dehydroandrographolide	Shamimin	Swertiajaponin		2-Furaldehyde	Tryptanthrin
Manninotriose	luteolin	8-Methoxy-5-O-Glucoside Flavone	Lochneridine	Paniculogenin	Mangiferin	Loganin		Linalyl Oxide
D-Mannitol	apigenin	Scutevulin	Coronarin A	Andrographidine E	Decussatin	Gentianol		Carvacrol
Rehmannioside B	acacetin	7,2',6'-Trihydroxy-5-Methoxyflavanone	Vineridine	Andrographidine D	Bellidifolin	Scandoside		Methyl Palmitate
Catalpol	Rosmarinic acid methyl ester	Baicalin	Lochnerine	Wogonin	Desmethylbellidifolin	Gentiopicroside Tetraacetate		Chlorogenin
Rehmannioside D	2,3-2H-3-hydroxy-caffeic acid methyl ester	5,8,2'-Trihydroxy-6,7-Dimethoxyflavone	Vinamidine	Beta-Sitosterol-3-O-Beta-D-Xylopyranoside	Protocatechuic acid	Gentianose		1-Hexanol
Rehmannioside C	caffeic acid	Isoscutellarein	Dehydrologanin	Andrographolide	1,7-Dihydroxy-3,8-dimethoxyxanthone	Gentioflavine		Beta-Sitosterol-3-O-Beta-D-Xylopyranoside
	4-hydroxybenzoic acid	Isoschaftoside	Lochnericine	Andrographin	1,8-Dihydroxy-3,5-dimethoxyxanthone	Gentiopicroside		Methyl Linoleate
	Protocatechuic acid	Scutellarin	Tetrahydroalstonine	Mono-O-Methylwightin	1-Hydroxy-3,5-dimethoxyxanthone	Loganicacid		Chrysoeriol
		Chrysoeriol	Skatole	Andrographidine B	Telephioidin	Rindoside		Eugenol Methyl Ether
		20-Hexadecanoylingenol	Leurosine	Dauricine	leanolic acid	Gentisein		Farnesyl Acetate
		7,2',6'-Trihydroxy-5-Methoxychalcone	Leurosidine	5-Hydroxy-7,2',6'-Trimethoxyflavone	2-Phenylethyl-β-D-glucoside	Rishitin		Benzyl Cyanide
		Eriodictyol	Vincathicine	Neoarctin B	Amaroswerin	Gentianine		Loganoside
		1-Phenyl-1,3-Butanedion	Loganoside	Andrographin F	Orcinol	Gentiatibetine		Lonicerin
		5,7,2',3'-Tetrahydroxyflavone	Mitraphylline	Andrographidine C	ellidtfolin	Amaroswerin		2-Heptadecanone
		M-Methoxybenzaldehyde	Gomaline	Deoxyandrographolide	1,3,7,8-tetrahydroxyxanthone	Swertianin		Loganin
		5-Hydroxy-7,8-Dimethoxyflavone	Fluorocarpamine	Andrographan	1,3,8-trihydroxy-5-methoxyxanthone	Gentiopicrin		Macrocarpal A
		Wogonoside	Vinblastine	14-Deoxy-11-Oxoandrographolide	Methylswertianin	Trifolin		Stigmasterol
		5,7-Dihydroxy-6,8,2',3'-Tetramethoxyflavone	Pseudaconitine	Paniculatin	sweroside	Luteolin		Geranyl Acetate
		5,7,2'-Trihydroxyflavone	Vincoline	Andrograpanin	Gentiopicroside	Scabroside		Citronellyl Acetate
		Campesterol	3,4-Dehydrolycopen-16-Al	Deoxyelephantopin		Swertiamarin		Alpha-Terpineol
		Stigmasterol	Catheduline E2	Skullcapflavone I		Amarogentin		Luteolin
		7,2'6'-Trihydroxy-5-Methoxyflavanone	Dihydrovindolinine	Beta-Sitosterol		Sweroside		Caffeicacid
		4,5,6-Trihydroxy-Aurone	Loganin	Andrographoside				Chlorogenic Acid
		5,7,2'-Trihydroxy-8,6'-Dimethoxyflavone	Serpentinine	2'-Hydroxy-3',4-Dimethoxy-Isoflavane-7-O-Beta-D-Glucoside				Ethyl Linolenate
		5,7,2'-Trihydroxy-6-Methoxyflavone	Taccalonolide E	Panicolin				Insularine
		(E)-4-Phenyl-3-Buten-2-One	Fluorocarpamine-N-Oxide	Alpha-Monoolein				Benzyl Alcohol
		6-Methoxygossypol	Secologanin	Neoandrographolide				Geraniol
		Nothosmyrnol	Vindorosine	Daucosterol				Ethyl Palmitate
		Suffruticoside A	(-)-Tetrahydroberberine	Andrographiside				Dibutyl Phthalate
		Dihydroperilla Alcohol	Vincadioline	Andrographidine A				Linamarin
		Eriodictyol-7,3-Diglucoside	Vindolinine					Hederagenin
		Phenylbutanone-Glucoside	Delphatine					Caffeic Acid
		5,7,3',4'-Tetrahydroxy-6,8-Dimethoxy Flavone	Pleniradin					3-Methyl-2-(2-Pentenyl)-2-Cyclopenten-1-One
		1,6-Dihydroxy-3,5,7-Trimethoxyxanthone	Vincarin					Macranthoin F
		Osladin	Sweroside					Benzyl Benzoate
		7,3',4'-Trihydroxyflavone	Serpentine					Macranthoidin A
		Wogonin	Akuammicine					Farnesal
		Gamma-Sitosterol	Isoleurosine					Nerol
		Dihydrobaicalin	Insularine					Delta-Terpineol
		2',7-Dihydroxy-4',5'-Dimethoxyisoflavone	Alstonine					Gamma-Sitosterol
		5,7,4'-Trihydroxy-6-Methoxyflavanone	Gomisin					Beta-Pinene
		5,7,2',6'-Tetrahydroxyflavone	Catharine					Isochlorogenic Acid B
		Oroxylin A	2alpha-Acetoxy-2'Beta-Deacetyl-1-Hydrolaustrospicatine					Pentanoic Acid
		Beta-Skytanthine	Moellendorffiline					Benzaldehyde
		Norwogonin	Syringetin-3-O-Robinobioside					Phenylacetaldehyde
		5,8-Dihydroxy-6,7-Dimethoxyflavone	Isositsirikine					Isoeugenol
		5,6,7,3',4'-Pentahydroxy-3-Methoxyflavone	Dihydrositsirikine					Citronellol
		Woodorien	Isoimperatorin					Carvacrol Acetate
		Skullcapflavone Ii	(6s,9r)-Roseoside					2-Methylbutanoic Acid
		4'-Hydroxywogonin	Adenosine					Hederagenin 3-O-Arabinoside
		Paniculatin	Vincoside Lactam					Macranthoside A
		5,7,4'-Trihydroxy-8-Methoxyflavone	Coronaridine					Phenethyl Alcohol
		1,3,5-Trihydroxyxanthone	Ajmalicine					(3r)-4'-Methoxy-2',3,7-Trihydroxyisoflavanone
		Skullcapflavone I	Deacetoxyvinblastine					Ethyl-P-Digallate
		Sucrose	Vincamine					1,1'-Bicyclohexyl
		1-(4-Hydroxy-3-Methoxyphenyl)-3,5-Octane-Diol	Dihydrosolidagenone					Loganicacid
		Isoscutellarein 8-O-Beta-D-Glucuronide	Pleiocarpamine					2-Heptanol
		5,8,2'-Trihydroxy-7-Methoxyflavone	Tabersonine					Eugenol
		5,2',5'-Trihydroxy-6,7,8-Trimethoxyflavone	Catharosine					Macranthoidin B
		Baicalein	Catharanthamine					Hexanoic Acid
		3,4-Dihydroxy-6,7,3',4'-Tetramethoxyflavonol	Vincristine					Farnesol
		5,2',6'-Trihydroxy-7,8-Dimethoxyflavone	Catharanthine					Linalool
			Sitsirikine					Nerolidol
			Pericyclivine					New Triterpennoid Glycoside
			Loganic Acid					1-Hexene
			Perivine					Neochlorogenic Acid
			Vindoline					Loniceracetalide A
			Rosmaricine					2-Methyl-1-Butanol
			Tabernoschizine					Isochlorogenic Acid
			Levulinic Acid
			Lochnerinine
			Vincetoxicoside B
			Vindolin
			Acetoin
			Securinine
			Perilal

## Sheet: Hot_compounds
hot1	hot2	hot3	hot4	hot5	hot6	hot7	hot8	hot9	hot10
Allicin	Taibairubescensin A	Benzyl Alcohol	2-Furaldehyde	Scutellarin	Alpha-Linolenic Acid	anhuienoside E	Choline	Tetradecane	catechin
	Nonaldehyde	Ethanol	Uridine	Catechol	Dimethyl Phthalate	glycoside St-14a	Protocatechuic Acid-3-Glucoside	Tridecene	epicatechin
	Glabcensin V	Borneol	Elemol	Catharanthamine	Ethanol	hemsgiganoside B	Conimine	1,22-Docosanediol	procyanidin B2
	Rubescensin H	Phenylacetonitrile	Tryptophan	Scutevulin	Carvacrol	flaccidosideⅡ	Valine	Ginsenoside	icariside B1
	Taibairubescensin B	Demethoxycurcumin	Eudesobovatol A	Methyl 4,6-Di-O-Galloyl-Beta-D-Glucopyranoside	2,4-Decadienal	hederasaponin B	Threonine	(-)-Dicentrine	2,4,6-trimethoxy-1-O-β-D-glucopyranoside
	D-Limonene	Tetramethylpyrazine	Methyl 3,4,5-Trimethoxycinnamate	5-O-Caffeoylshikimic Acid	Nor-Rubrofusarin	Monoethyl Malonate	L-Arginine	Notoginsenoside R4	lyoniside
	Sideritiflavone	Dehydrodeguelin	Elemicin	Breviscapine	(-)-Epiafzelechin	oleanolic acid 3-O-β-D-glucopyranosyl-(6’-butyryl)28-O-α-L-rhamnopyranosyl-(1→4)-β-D-glucopyranosyl-(1→6)-β-D-glucopyranosyl	Gamma-Aminobutyric Acid	(-)2d,4d,6d,8d-Tetramethyl Undecanoic Acid	ssioriside
	Beta-Pinene	Formic Acid	(+)-Maalioxide		Octanol	oleanolic acid	Chrysanthemaxanthin	Sandaracopimarinol	ent-lyoniside
	Decane	Octanoic Acid	Gamma-Selinene		Cis-P-2-Menthen-1-Ol	oleanolic acid 3-O-α-D-glccopyranosyl-(1→2)-α-D-xylopyranoside	1-Octene	N-Pentadecane	norpredicentrine
	20-Hexadecanoylingenol	Curdione	Atractylenolide Ii		Gamma-Terpinene	eleutheroside K	Beta-Sitosterol-3-O-Beta-D-Xylopyranoside	Ginsenoside Rb1	laurolitsine
	P-Cymene	Naphthalene	Atractylodin		Pseudoephedrine	oleanolic acid 3-O-x-L-rham-nopyranosyl-(1→2)-β-D-xylopyranoside	Phenylalanine	Heneicosane	(+)-flavinantine
	Rubiadin	Curcumenether	6,6'-Dimethoxygossypol		D-Norpseudoephedrine	oleanolic acid 3-O-β-D-glccopyranosyl-(1→2)-α-L-arabinofurnoside	Gamma-Sitosterol	Dicapryl Phthalate	3,4, 5-trimethoxyphenyl-β-D-glucopyranoside
	Dawoensin A	Pentadecanoic Acid	Beta-Eudesmol		P-Cymene	oleanolic acid 3-O-α-D-glccuronopyranose	Methyl Eicosanoate	Delta-Elemene	epicatechin-( 2β→O→7，4β→8) -ent-catechin-( 4β→8) -epicatechin
	Wushanicariin	Lauric Acid	Hinesol		Lauric Acid	oleanolic acid 3-O-α-D-glccuronopyranose methyl ester	Guanosine	Cyperene	aciphyllic acid
	Rabdoternin C	Turmerone	Tr-Saponin A		Herbacetin	oleanolic acid 28-O-x-L-rhamnopy-ranosyl(1→4)-β-D-glccopyranosyl(1→6)-β-D-glccopyranosyl	(S)-Serine	Heptadecane	glaucic acid
	Poricoic Acid A	1,7-Bis(4-Hydroxyphenyl)-1-Heptene-3,5-Dione	Beta-Humulene		Tetradecanoic Acid	oleanolic acid 3-O-β-D-glccuronopyranose 28-O-α-L-rhamnopyr-anosyl(1→4)β-D-glccopyranosyl(1-→6)-β-D-glccopyranoside	Dauricine	(-)-Trifara-9,14-Diene	(-) -magnocurarine
	Elemicin	Benzaldehyde	Syringin		O-Xylene	oleanolic acid 3-O-β-D-glccopyranosyl methyl ester 28-O-αx-L-rhamnopyranosyl(1→4)-β-D-glccopyranosyl(1→6)-β-D-glccopyranoside	Beta-Aminobutyric Acid	Cycloeucalenol	N-methyl-laurotetanine
	Orientin	Phenylacetaldehyde	Atractylone		1,1,3-Trimethylcyclopentane	oleanolic acid 3-O-β-D-glccopyranosyl-(1→2)-β-D-xylopyranosy1-2β-O-x-L-rhamnopyranosyl(1→4)-β-D-glccopyranosyl(1→6)-β-D-glccopyranoside	Proline	4,4'-Diketo-3-Hydroxy-Beta-Carotene	laurotetanine
	Decanal	3-Methoxy-7-Hydroxycadalenal	2-(8-Methyl-2,8-Dihydroxy-9-Oxo-2-Hydroxymethylbicyclo[5.3.0]Decan-7-Yl)Isopropanol Glucoside		D-Pseudoephedrine	oleanolic acid 3-O-x-L-rh-amnopyranosyl-(1→2)-α-L-arabinopyrmosyl-2β-O-α-L-rhamnopyranosyl(1→4)-β-D-glccopyranosyl(1→6)-β-D-glccopyranoside	Homogentisic Acid	Nonadecanoic Acid	(+) -boldine
	Melissoidesin G	Curcumine	Eudesmol		Apigenin		Bis(4-Hydroxybenzyl) Ether	Quercetin	(-) -norisoboldine
	Xindongnin B	Curcumin	Atractylon		Methyl Acetate		L-Histidine	Eicosane	(+) -norisocorydine
	1,8-Cineole	Caprylic Acid	Elenolide		Guaiazulene		Homoharringtonine	Notoginsenoside R3	p-methane-3,8-trans-diol
	Oridonin	Curcumol	2-Furancarboxylic Acid		Safranal		Coniine	Ditertbutyl Phthalate	p-methane-3,8-cis-diol
	Ursolicacid	Aniline	Guaiol		Linalool Oxide		9-Heptadecanol	N-Nonadecane	eudesm-4(15) -ene-7,11-diol
	Ponicidin	Turricolol E	Alpha-Chamigrene		1,8-Cineole		(S)-Tyrosine	Hexadecanoic Acid	4β, 6β-dihydroxy-1α, 5β(H) -guai-9-ene
	2,6-Nonamethylene Pyridine	Tridecane	Atractylenolide I		P-Isopropyl-Benzaldehyde		Ephedrine	Dauricine
	Alpha-Limonene	Capraldehyde			Heneicosane		L-Alanine	Hexadecane
	Rubescensin C	N-Undecane			Methyl Benzoate		Methionine	3,4-Dimethylbenzoic Acid
		Linalool			Alpha-Terpineol		Trigonelline	Panaxynol
		4-Methoxy-5-Hydroxybisabola-2,10-Diene-9-One			1,4-Cineole		Glycine	Notoginsenoside R1
		Ethyl Benzene			Heptadecane		Daucosterol	Ethyl-P-Digallate
		Methyl Benzoate			Ephedrine			Mycosinol
		Bisdemethoxycurcumin			1-Octen-3-Ol			Notoginsenoside A
		Alpha-Terpineol			M-Xylene			Docosane
		Hexahydrocurcumin			Decanoic Acid			Methyl Isobutyl Ketone
		2-Methyl Pentane			11-Methoxyhumantenine			Gypenoside Xvii
		Heptanol			Styrene			Daucosterol
		Dehydrocurdione			Beta-Eudesmol			Epsilon-Cadinene
		1,7-Bis(4-Hydroxy-3-Methoxyphenyl)-1,4,6-Heptatrien-3-One			Phenanthrene			1-Tetradecanol
		Bisacumol			2,3,5,6-Tetramethyl-Pyrazine			Cyperol
					2-Methyl-2-Butenal			Hentriacontane
					Kaempferol			1-Heptadecanol
					Geraniol			Panaxydol
					Dibutyl Phthalate			N-Nonanol
					Maragenin Ii			Acetophenone
					Limonene			Encecalin
					Alpha-Pinene			20-Hexadecanoylingenol
					Terpinen-4-Ol			Notoginsenoside R2
					Delta-Terpineol			Elemicin
					Naphthalene			Sanchinoside B1
					Kaempferol-3-Rhamnoside			Alpha-Cuparenol
					6-Methyl-2-Heptanone			Cyclododecanone
					Beta-Pinene			Ethyl Pyroglutamate
					Hexadecanoic Acid			Stigmasterol
					Xylene			Panaxatriol
					O-Methylptelefolonium			Isoaloesin
					Benzaldehyde			Panaxadiol
					Camphor			Notopterol
					Citronellol			Panaxytriol
					Heptanoic Acid			Dithiocyclopentene
					7-Demethylsuberosin			Heneicosanic Acid
					Methylpseudoephedrine			2,2,2-Triethoxyl-Ethanol
					Norerythrostachaldine			Coprine
					N-Triacontanol			1,1,5,5-Tetramethyl-4-Methano-2,3,4,6,7,10-Hexahydronaphthalene
					Beta-Cyclocitral			Guaijaverin
					Octadecane			Delta-Guaiene
					Tricin			1-Methyl-4-Isoallyl-Cyclohexane
					Linalool			Gamma-Sitosterol
					Nerolidol			Pentadecanoic Acid
					Norpseudoephedrine			Ginsenoside-Rb2
					Myrcene			Cuparene
					Cibarian			Engeletin
					Methyl-7-Epiganoderate			Pancratistatin
					Cuminyl Alcohol			L-Alpha-Amino-Beta-Oxalylaminopropionic Acid
					Thymol			Ginsenoside-Rd
					Menthyl Acetate
					Tetracosane
					Hexanal
					N-Methylephedrine
					Methyl Palmitate
					3-Methoxyherbacetin
					Dibenzofuran
					Linolenic Acid
					Octanoic Acid
					Dihydro-Beta-Ionone
					3,4-Dimethyl-5-Phenyloxazolidine
					Acetophenone
					1-Phenyl-1,2-Propanedione
					Hexahydrofarnesylacetone
					Alpha-Terpinolene
					1,5-Dimethyl-Naphthalene
					Pseudoginsenoside F11
					Dodecanoic Acid
					Norephedrine
					Nonanal
					Maokonine
					Pseudoephedroxane
					6-Methyl-5-Hepten-2-One
					1-Octanol
					Chuanxiongzine
					Tetramethylpyrazine
					Linoleic Acid
					Methyl Furoate
					Tricosane
					Beta-Ionone
					Octadecanoic Acid
					Glucoraphanin
					Pentadecanoic Acid
					2,3,4-Trimethyl-5-Phenyloxazolidine
					Phenethylamine
					Ephedroxane
					Isobutyl Benzoate
					Trans-2-Nonenal
					Leucodelphinidin
					Alpha-Ionone
					Phenethyl Caffeate
					Nonadecane
					Phytol
					Myricadiol
					Kaempferol-7-Rhamnoside
					4-Isopropyl-Benzaldehyde
					Nonanoic Acid
					Leucopelargonidin
					Hexanol
					16-Triacontanol
					2-Pentadecanone
					Sabinene
					Hexanoic Acid
					Acetic Acid
					Rose Oxide
					Piperitone
					Vanillic Acid

## Sheet: Cold_specific_componds
Sample id	HM Latin name	HM Chinese name	Compound	KEGG pathway
cold3	Radix Scutellariae	Huang Qin	Skullcapflavone I	-
cold4	Herba Catharanthi Rosei	Chang Chun Hua	Insularine	-
cold4	Herba Catharanthi Rosei	Chang Chun Hua	Loganoside	-
cold4	Herba Catharanthi Rosei	Chang Chun Hua	Sweroside	-
cold5	Herba Andrographis	Chuan Xin Lian	Skullcapflavone I	-
cold6	Herba Swertiae Mussotii	Zang Yin Chen	Amaroswerin	-
cold6	Herba Swertiae Mussotii	Zang Yin Chen	sweroside	-
cold7	Radix Gentianae	Long Dan	Amaroswerin	-
cold7	Radix Gentianae	Long Dan	Loganicacid	-
cold7	Radix Gentianae	Long Dan	Sweroside	-
cold9	Flos Lonicerae	Jin Yin Hua	Insularine	-
cold9	Flos Lonicerae	Jin Yin Hua	Loganicacid	-
cold9	Flos Lonicerae	Jin Yin Hua	Loganoside	-
cold4	Herba Catharanthi Rosei	Chang Chun Hua	Inositol	ABC transporters
cold9	Flos Lonicerae	Jin Yin Hua	Inositol	ABC transporters
cold6	Herba Swertiae Mussotii	Zang Yin Chen	Gentiopicroside	Biosynthesis of alkaloids derived from terpenoid and polyketide
cold7	Radix Gentianae	Long Dan	Gentiopicroside	Biosynthesis of alkaloids derived from terpenoid and polyketide
cold2	Herba Dracocephali Tangutici	Tang Gu Te Qing Lan	caffeic acid	Biosynthesis of phenylpropanoids
cold2	Herba Dracocephali Tangutici	Tang Gu Te Qing Lan	Protocatechuic acid	Biosynthesis of phenylpropanoids
cold6	Herba Swertiae Mussotii	Zang Yin Chen	Protocatechuic acid	Biosynthesis of phenylpropanoids
cold9	Flos Lonicerae	Jin Yin Hua	Caffeic Acid	Biosynthesis of phenylpropanoids
cold4	Herba Catharanthi Rosei	Chang Chun Hua	Loganin	Biosynthesis of terpenoids and steroids
cold7	Radix Gentianae	Long Dan	Loganin	Biosynthesis of terpenoids and steroids
cold9	Flos Lonicerae	Jin Yin Hua	Loganin	Biosynthesis of terpenoids and steroids
cold2	Herba Dracocephali Tangutici	Tang Gu Te Qing Lan	Luteolin	Flavone and flavonol biosynthesis
cold3	Radix Scutellariae	Huang Qin	Chrysoeriol	Flavone and flavonol biosynthesis
cold7	Radix Gentianae	Long Dan	Luteolin	Flavone and flavonol biosynthesis
cold9	Flos Lonicerae	Jin Yin Hua	Chrysoeriol	Flavone and flavonol biosynthesis
cold9	Flos Lonicerae	Jin Yin Hua	Luteolin	Flavone and flavonol biosynthesis
cold3	Radix Scutellariae	Huang Qin	Paniculatin	Flavonoids
cold3	Radix Scutellariae	Huang Qin	Wogonin	Flavonoids
cold4	Herba Catharanthi Rosei	Chang Chun Hua	Swertiajaponin	Flavonoids
cold5	Herba Andrographis	Chuan Xin Lian	Paniculatin	Flavonoids
cold5	Herba Andrographis	Chuan Xin Lian	Wogonin	Flavonoids
cold7	Radix Gentianae	Long Dan	Swertiajaponin	Flavonoids
cold6	Herba Swertiae Mussotii	Zang Yin Chen	Swertiamarin	Terpenoids
cold7	Radix Gentianae	Long Dan	Swertiamarin	Terpenoids
"-" : mean NO ENTRY FOUND in KEGG databases.

## Sheet: Hot_specific_componds
Sample id	HM Latin name	HM Chinese name	Compound	KEGG pathway
hot2	Herba Rabdosiae Rubescentis	Dong Ling Cao	P-Cymene	Degradation of aromatic compounds
hot2	Herba Rabdosiae Rubescentis	Dong Ling Cao	1,8-Cineole	Monoterpenoid biosynthesis
hot2	Herba Rabdosiae Rubescentis	Dong Ling Cao	Elemicin	Phenylpropanoids
hot3	Rhizoma Curcumae Longae	Jiang Huang	Methyl Benzoate	-
hot3	Rhizoma Curcumae Longae	Jiang Huang	Tetramethylpyrazine	-
hot3	Rhizoma Curcumae Longae	Jiang Huang	Ethanol	Biosynthesis of antibiotics
hot3	Rhizoma Curcumae Longae	Jiang Huang	Naphthalene	Degradation of aromatic compounds
hot3	Rhizoma Curcumae Longae	Jiang Huang	Lauric Acid	Fatty acid biosynthesis
hot3	Rhizoma Curcumae Longae	Jiang Huang	Octanoic Acid	Fatty acid biosynthesis
hot3	Rhizoma Curcumae Longae	Jiang Huang	Pentadecanoic Acid	Fatty acyls
hot4	Rhizoma Atractylodis	Cang Zhu	Elemicin	Phenylpropanoids
hot4	Rhizoma Atractylodis	Cang Zhu	Beta-Eudesmol	Terpenoids
hot6	Herba Ephedrae	Ma Huang	Heneicosane	-
hot6	Herba Ephedrae	Ma Huang	Methyl Benzoate	-
hot6	Herba Ephedrae	Ma Huang	Tetramethylpyrazine	-
hot6	Herba Ephedrae	Ma Huang	Ethanol	Biosynthesis of antibiotics
hot6	Herba Ephedrae	Ma Huang	Acetophenone	Degradation of aromatic compounds
hot6	Herba Ephedrae	Ma Huang	Naphthalene	Degradation of aromatic compounds
hot6	Herba Ephedrae	Ma Huang	P-Cymene	Degradation of aromatic compounds
hot6	Herba Ephedrae	Ma Huang	Hexadecanoic Acid	Fatty acid biosynthesis
hot6	Herba Ephedrae	Ma Huang	Lauric Acid	Fatty acid biosynthesis
hot6	Herba Ephedrae	Ma Huang	Octanoic Acid	Fatty acid biosynthesis
hot6	Herba Ephedrae	Ma Huang	Heptadecane	Fatty acyls
hot6	Herba Ephedrae	Ma Huang	Pentadecanoic Acid	Fatty acyls
hot6	Herba Ephedrae	Ma Huang	1,8-Cineole	Monoterpenoid biosynthesis
hot6	Herba Ephedrae	Ma Huang	Ephedrine	Phenylalanine metabolism
hot6	Herba Ephedrae	Ma Huang	Beta-Eudesmol	Terpenoids
hot8	Rhizoma Pinelliae	Ban Xia	Ephedrine	Phenylalanine metabolism
hot9	Radix Notoginseng	San Qi	Heneicosane	-
hot9	Radix Notoginseng	San Qi	Acetophenone	Degradation of aromatic compounds
hot9	Radix Notoginseng	San Qi	Hexadecanoic Acid	Fatty acid biosynthesis
hot9	Radix Notoginseng	San Qi	Heptadecane	Fatty acyls
hot9	Radix Notoginseng	San Qi	Pentadecanoic Acid	Fatty acyls
hot9	Radix Notoginseng	San Qi	Elemicin	Phenylpropanoids
"-" : mean NO ENTRY FOUND in KEGG databases.
